# Supplementary material
Source: PubMed Central journal article supplement (PMC5951390)
Supplement: NIHMS962969-supplement-Supplement.pdf [file NIHMS962969-supplement-Supplement.pdf]

# Supplementary Information: Increased diversity of peptidic natural products revealed by modification-tolerant database search of mass spectra

Alexey Gurevich<sup>1</sup>, Alla Mikheenko<sup>1</sup>, Alexander Shlemov<sup>1</sup>, Anton Korobeynikov<sup>1,2</sup>, Hosein Mohimani<sup>3,4</sup>, and Pavel A. Pevzner<sup>1,3,\*</sup>

<sup>1</sup>Center for Algorithmic Biotechnology, Institute of Translational Biomedicine, St. Petersburg State University, St. Petersburg, Russia

<sup>2</sup>Department of Mathematics and Mechanics, St. Petersburg State University, St. Petersburg, Russia

<sup>3</sup>Department of Computer Science and Engineering, University of California, San Diego, La Jolla, CA, USA

<sup>4</sup>Department of Computational Biology, Carnegie Mellon University, Pittsburgh, PA, USA

\*pevzner@ucsd.edu

## Supplementary Tables

**Supplementary Table 1.** Information about spectral datasets. *Instrument* stands for mass-spectrometry hardware used for obtaining the dataset. *Size* of each dataset is given in initial state (downloaded from the GNPS storage [1]) and after the preprocessing procedure (peaks merging and filtering) performed by VarQuest, both are given in GB. *GNPS ID* stands for unique spectral dataset identifier at the GNPS storage.

| Dataset      | <i>Spectra</i> <sub>PSEUD</sub> | <i>Spectra</i> <sub>STREP<sub>1</sub></sub> | <i>Spectra</i> <sub>STREP<sub>2</sub></sub> | <i>Spectra</i> <sub>CYANO</sub> | <i>Spectra</i> <sub>GNPS</sub> |
|--------------|---------------------------------|---------------------------------------------|---------------------------------------------|---------------------------------|--------------------------------|
| # spectra    | 413234                          | 178635                                      | 473135                                      | 11230344                        | ≈ 130 millions                 |
| Origin       | Pseudomonas                     | Streptomyces                                | Streptomyces                                | Cyanobacteria                   | -                              |
| Instrument   | microTOF-Q                      | LTQ Orbitrap                                | Q-TOF                                       | maXis                           | -                              |
| Initial size | 0.3                             | 8.4                                         | 142.5                                       | 28.2                            | -                              |
| Prepr. size  | 0.1                             | 0.3                                         | 2.5                                         | 12.0                            | -                              |
| GNPS ID      | MSV-79450                       | MSV-78604                                   | MSV-78839                                   | MSV-78568                       | 120 datasets                   |

**Supplementary Table 2.** Performance of four PNP identification approaches on various spectral datasets against the PNPdatabase with 5021 PNPs. *Preprocessing* stands for the time needed for constructing the list of candidate peptides for all input spectra; *Processing* stands for the time needed for scoring and statistical significance estimation of all considered PSMs. *Peak RAM* stands for maximal RAM usage. *Spectra<sub>GNPS</sub>* was processed as 120 independent datasets, so the running time is a sum of 120 independent running times. Spectral networks were constructed using the GNPS interface (the Molecular Networking workflow [1]) with precursor and fragment ion tolerance set to 0.02 Da and all other parameters set to the default values. When processing *Spectra<sub>CYANO</sub>*, the SpecNets tool crashed after a week of execution, and the BruteForce approach crashed due to exceeding memory limit. All tools were run on a 12 CPU Intel Xeon X7560 2.27GHz cluster node with 25 GB RAM.

| Method                                     | Time (hh:mm)  |            | Peak RAM<br>(GB) |
|--------------------------------------------|---------------|------------|------------------|
|                                            | Preprocessing | Processing |                  |
| <i>Spectra<sub>PSEUD</sub></i>             |               |            |                  |
| Standard                                   | 0:00          | 0:04       | 0.4              |
| SpecNets                                   | 0:47          | 0:12       | 0.5              |
| BruteForce                                 | 0:00          | 6:52       | 0.8              |
| VarQuest                                   | 0:01          | 3:16       | 0.4              |
| <i>Spectra<sub>STREP<sub>1</sub></sub></i> |               |            |                  |
| Standard                                   | 0:00          | 0:04       | 2.7              |
| SpecNets                                   | 1:23          | 0:15       | 2.7              |
| BruteForce                                 | 0:00          | 10:38      | 5.0              |
| VarQuest                                   | 0:00          | 4:41       | 2.9              |
| <i>Spectra<sub>STREP<sub>2</sub></sub></i> |               |            |                  |
| Standard                                   | 0:00          | 0:22       | 5.2              |
| SpecNets                                   | 3:29          | 0:43       | 5.3              |
| BruteForce                                 | 0:00          | 4:46       | 16.0             |
| VarQuest                                   | 0:01          | 1:36       | 7.3              |
| <i>Spectra<sub>CYANO</sub></i>             |               |            |                  |
| Standard                                   | 0:01          | 0:37       | 14.5             |
| VarQuest                                   | 0:29          | 19:48      | 15.8             |
| <i>Spectra<sub>GNPS</sub></i>              |               |            |                  |
| Standard                                   | 0:16          | 10:39      | 16.0             |
| VarQuest                                   | 40:35         | 1681:06    | 18.9             |

**Supplementary Table 3.** Cyclosporin family in the PNPdatabase (47 cyclic PNPs, each of them 11 amino acid long). 29 of them were identified in *Spectra<sub>GNPS</sub>* as unmodified peptides (both by DEREPLICATOR and VarQuest). The remaining 18 variants were identified only as peptide variants (VarQuest only), each of them is represented by a single variant, mass shift is specified in a PNP name and the most likely position for modification/mutation is shown in *Structure* column by bold and underlined font. *Compound name* stands for the PNP description in its original database (35 came from DNP [2] and 12 from AntiMarin [3]). *Mass* is the integer mass in Da, modification/mutation mass shift is taken into account for the novel variants. *Structure* column shows rounded monoisotopic masses of amino acids (in Da) starting from the largest one (in most cases it is Bmt with mass 183 Da). Abbreviations: *Bmt* for butenyl-methyl-threonine, *pen* for pentanoic acid, *but* for butanoic acid.

| #                                                                    | Compound name                          | Mass | Structure  |     |            |            |            |    |            |            |            |    |           |
|----------------------------------------------------------------------|----------------------------------------|------|------------|-----|------------|------------|------------|----|------------|------------|------------|----|-----------|
| Identified in <i>Spectra<sub>GNPS</sub></i> as known peptides        |                                        |      |            |     |            |            |            |    |            |            |            |    |           |
| 1                                                                    | NVA2-hydroxy-MeL4-cyclosp              | 1232 | 183        | 113 | 127        | 127        | 71         | 71 | 127        | 99         | 143        | 71 | 99        |
| 2                                                                    | (dihyd-MeBmt)1-(hydroxy-MeL)4-cyclosp  | 1220 | 185        | 113 | 127        | 127        | 71         | 71 | 127        | 99         | 143        | 71 | 85        |
| 3                                                                    | Ser-cyclosp                            | 1218 | 183        | 113 | 127        | 127        | 87         | 71 | 127        | 99         | 127        | 71 | 85        |
| 4                                                                    | (8-hydroxy-MeBmt)1-cyclosp             | 1218 | 199        | 113 | 127        | 127        | 71         | 71 | 127        | 99         | 127        | 71 | 85        |
| 5                                                                    | Antibiotic FR 901459                   | 1218 | 183        | 113 | 113        | 127        | 71         | 71 | 127        | 113        | 127        | 71 | 101       |
| 6                                                                    | Cyclosporin C                          | 1218 | 183        | 113 | 127        | 127        | 71         | 71 | 127        | 99         | 127        | 71 | 101       |
| 7                                                                    | hydroxy-MeL4-cyclosp                   | 1218 | 183        | 113 | 127        | 127        | 71         | 71 | 127        | 99         | 143        | 71 | 85        |
| 8                                                                    | Cyclosporin V                          | 1216 | 183        | 113 | 127        | 127        | 71         | 85 | 127        | 99         | 127        | 71 | 85        |
| 9                                                                    | (MeVal)5-cyclosp                       | 1216 | 183        | 113 | 127        | 127        | 71         | 71 | 127        | 113        | 127        | 71 | 85        |
| 10                                                                   | Isocyclosp D                           | 1216 | 183        | 113 | 127        | 127        | 71         | 71 | 127        | 99         | 127        | 71 | 99        |
| 11                                                                   | Cyclosporin P                          | 1204 | 169        | 113 | 127        | 127        | 71         | 71 | 127        | 99         | 127        | 71 | 101       |
| 12                                                                   | Cyclosporin W                          | 1204 | 183        | 99  | 127        | 127        | 71         | 71 | 127        | 99         | 127        | 71 | 101       |
| 13                                                                   | Cyclosporin Y                          | 1202 | 183        | 113 | 127        | 127        | 71         | 71 | 113        | 99         | 127        | 71 | 99        |
| 14                                                                   | Cyclosporin X                          | 1202 | 183        | 113 | 127        | 113        | 71         | 71 | 127        | 99         | 127        | 71 | 99        |
| 15                                                                   | Cyclosp-N*-De-Me                       | 1202 | 183        | 113 | 113        | 127        | 71         | 71 | 127        | 99         | 127        | 71 | 99        |
| 16                                                                   | Cyclosp-9-(N-Met-Ile)                  | 1202 | 183        | 113 | 127        | 127        | 71         | 71 | 127        | 99         | 127        | 71 | 85        |
| 17                                                                   | (MeThr)4-cyclosp                       | 1190 | 183        | 113 | 127        | 127        | 71         | 71 | 127        | 99         | 115        | 71 | 85        |
| 18                                                                   | Cyclosporin E                          | 1188 | 183        | 99  | 127        | 127        | 71         | 71 | 127        | 99         | 127        | 71 | 85        |
| 19                                                                   | Cyclosporin L                          | 1188 | 169        | 113 | 127        | 127        | 71         | 71 | 127        | 99         | 127        | 71 | 85        |
| 20                                                                   | Cyclosporin U                          | 1188 | 183        | 113 | 127        | 127        | 71         | 71 | 113        | 99         | 127        | 71 | 85        |
| 21                                                                   | Cyclosporin B                          | 1188 | 183        | 113 | 127        | 127        | 71         | 71 | 127        | 99         | 127        | 71 | 71        |
| 22                                                                   | Cyclosp-4-(2-(Metamino)pen)            | 1188 | 183        | 113 | 113        | 127        | 71         | 71 | 127        | 99         | 127        | 71 | 85        |
| 23                                                                   | Cyclosp-10-(2-Aminobut)                | 1188 | 183        | 113 | 127        | 127        | 71         | 71 | 127        | 85         | 127        | 71 | 85        |
| 24                                                                   | Cyclosp-N9-De-Me                       | 1188 | 183        | 113 | 127        | 127        | 71         | 71 | 127        | 99         | 113        | 71 | 85        |
| 25                                                                   | Cyclosp-Deoxy                          | 1186 | 167        | 113 | 127        | 127        | 71         | 71 | 127        | 99         | 127        | 71 | 85        |
| 26                                                                   | Cyclosporin Z                          | 1174 | 155        | 113 | 127        | 127        | 71         | 71 | 127        | 99         | 127        | 71 | 85        |
| 27                                                                   | Cyclosp-N5-De-Me                       | 1174 | 183        | 99  | 127        | 127        | 71         | 71 | 127        | 99         | 127        | 71 | 71        |
| 28                                                                   | Cyclosporin R                          | 1174 | 183        | 113 | 113        | 127        | 71         | 71 | 113        | 99         | 127        | 71 | 85        |
| 29                                                                   | Cyclosporin Q                          | 1174 | 183        | 113 | 127        | 127        | 71         | 71 | 127        | 99         | 99         | 71 | 85        |
| Identified in <i>Spectra<sub>GNPS</sub></i> only as peptide variants |                                        |      |            |     |            |            |            |    |            |            |            |    |           |
| 30                                                                   | 4,8-Di-hydroxy-MeL-Cycl A +131Da       | 1407 | 183        | 113 | <u>127</u> | 127        | 129        | 71 | 127        | 99         | 143        | 71 | 85        |
| 31                                                                   | (Hiv-L-T)-Cycl A 10-L +104Da           | 1351 | 183        | 113 | 113        | 127        | 100        | 71 | <u>127</u> | 113        | 127        | 71 | 101       |
| 32                                                                   | (Hiv-L-T)-Cycl A 8-G,10-L +106Da       | 1339 | 183        | 113 | 113        | 127        | <u>100</u> | 71 | 127        | 113        | 127        | 57 | 101       |
| 33                                                                   | Cyclosp-10-Ile +8Da                    | 1240 | 183        | 113 | 127        | 127        | 71         | 71 | 127        | <u>113</u> | 127        | 71 | 101       |
| 34                                                                   | (Hiv-L-T)-Cycl A +7Da                  | 1240 | 183        | 113 | <u>113</u> | 127        | 100        | 71 | 127        | 99         | 127        | 71 | 101       |
| 35                                                                   | Cyclosp-7-Hydroperoxide -11Da          | 1237 | 215        | 113 | 127        | 127        | 71         | 71 | 127        | 99         | 127        | 71 | <u>99</u> |
| 36                                                                   | Cyclosp-2-(O-(2-hydroxyeth)-Ser) -27Da | 1235 | 183        | 113 | 127        | <u>187</u> | 71         | 71 | 127        | 99         | 127        | 71 | 85        |
| 37                                                                   | (Hiv-L-T)-Cycl A 8-hydroxy,10-L -28Da  | 1235 | 199        | 113 | 113        | 127        | 100        | 71 | <u>127</u> | 113        | 127        | 71 | 101       |
| 38                                                                   | (Hiv-L-T)-Cycl A 9,10-Di-Leu +1Da      | 1234 | 183        | 113 | 113        | <u>127</u> | 100        | 71 | 127        | 113        | 113        | 71 | 101       |
| 39                                                                   | Allylgly-cyclosp +12Da                 | 1226 | <u>183</u> | 113 | 127        | 127        | 71         | 71 | 127        | 99         | 127        | 71 | 97        |
| 40                                                                   | (g-hydroxy-MeLeu)8-cyclosp -41Da       | 1219 | 183        | 113 | 127        | 127        | 129        | 71 | 127        | 99         | <u>127</u> | 71 | 85        |
| 41                                                                   | Cyclosporin S +28Da                    | 1218 | 183        | 113 | <u>127</u> | 127        | 71         | 71 | 127        | 99         | 99         | 71 | 101       |
| 42                                                                   | Cyclosp-4-Leu,-10-Ala +42Da            | 1218 | 183        | 113 | 113        | 127        | 71         | 71 | 127        | 71         | <u>127</u> | 71 | 101       |
| 43                                                                   | (Thr(2),Leu(5),Ala(10))cyclosp +14Da   | 1190 | 183        | 113 | 71         | 127        | 71         | 71 | 127        | 113        | <u>127</u> | 71 | 101       |

| #  | Compound name               | Mass   | Structure |            |     |     |            |    |    |     |     |            |    |     |
|----|-----------------------------|--------|-----------|------------|-----|-----|------------|----|----|-----|-----|------------|----|-----|
| 44 | (MeOT-2,MeA-3,MeV-5)cyclosp | -76Da  | 1184      | 183        | 113 | 127 | <b>127</b> | 71 | 71 | 127 | 113 | 127        | 85 | 115 |
| 45 | Cyclosporin O               | -67Da  | 1093      | 127        | 113 | 127 | 127        | 71 | 71 | 127 | 99  | <b>127</b> | 71 | 99  |
| 46 | Cyclosporin K               | -114Da | 1086      | 167        | 113 | 127 | 127        | 71 | 71 | 127 | 99  | <b>127</b> | 71 | 99  |
| 47 | Cyclosporin J               | -124Da | 1022      | <b>127</b> | 113 | 127 | 127        | 71 | 71 | 127 | 99  | 127        | 71 | 85  |

**Supplementary Table 4.** List of common mass offsets identified by VarQuest in *Spectra<sub>GNPS</sub>*. Only offsets identified in at least 30 distinct peptides are shown. The total offset range  $-300 \dots 300$  Da was divided into non-overlapping intervals of size 0.1 Da. All PSMs were grouped according to modified amino acid mass and offset. The groups were sorted by the number of unique peptides. *Offset* is the mass difference between a known PNP and its identified variant (in Da). *Residue* is the amino acid corresponding to the most likely location of the modification in a PNP graph. The fraction of the amino acid among all amino acids with the same mass offset is given in the parenthesis. Numbers of distinct PNPs, PNP families and PSMs identified with specified mutations/modifications are given in *# PNPs (families)* and *# PSMs* respectively. Abbreviations (in addition to standard amino acid identifiers): m.X for methylated version of X amino acid, *Hiv*, *Leuc*, *NMA*, and *Thz* are explained in details in Supplementary Table 19.

| Offset | Top-3 residues (fractions) |               |               | # PNPs (families) | # PSMs |
|--------|----------------------------|---------------|---------------|-------------------|--------|
|        | R1                         | R2            | R3            |                   |        |
| 14.0   | L/I (20.3%)                | V (18.9%)     | A (6.6%)      | 279 (101)         | 2851   |
| -14.0  | L/I (28.3%)                | V (11.5%)     | m.L/I (7.9%)  | 230 (94)          | 3289   |
| 18.0   | L/I (43.1%)                | P (10.3%)     | V (7.5%)      | 137 (72)          | 1255   |
| 28.0   | L/I (19.8%)                | V (15.8%)     | m.L/I (9.6%)  | 130 (59)          | 735    |
| -28.0  | L/I (21.4%)                | V (11.9%)     | m.L/I (6.0%)  | 116 (58)          | 1124   |
| 22.0   | L/I (30.4%)                | V (11.6%)     | P (8.3%)      | 112 (45)          | 482    |
| 16.0   | V (19.4%)                  | L/I (18.5%)   | m.L/I (14.5%) | 90 (50)           | 357    |
| 8.0    | L/I (28.0%)                | V (13.6%)     | m.A (12.7%)   | 89 (44)           | 785    |
| 30.0   | L/I (17.6%)                | V (10.2%)     | m.L/I (9.3%)  | 88 (49)           | 230    |
| 15.0   | V (17.4%)                  | L/I (13.8%)   | m.A (9.2%)    | 87 (52)           | 325    |
| -16.0  | L/I (13.8%)                | m.L/I (11.0%) | V (11.0%)     | 79 (52)           | 3435   |
| 32.0   | L/I (30.0%)                | V (20.0%)     | P (13.0%)     | 78 (53)           | 1028   |
| -15.0  | L/I (13.7%)                | A (10.8%)     | m.L/I (6.9%)  | 78 (46)           | 185    |
| -13.0  | L/I (20.2%)                | P (11.7%)     | A (8.5%)      | 77 (46)           | 269    |
| 36.0   | L/I (22.5%)                | V (16.9%)     | P (9.0%)      | 71 (37)           | 166    |
| -6.0   | L/I (24.7%)                | V (12.4%)     | T (8.2%)      | 71 (38)           | 186    |
| 42.0   | L/I (24.7%)                | V (12.9%)     | P (6.5%)      | 68 (41)           | 551    |
| 6.0    | L/I (21.1%)                | T (10.0%)     | m.L/I (8.9%)  | 67 (45)           | 509    |
| 12.0   | L/I (16.7%)                | V (11.9%)     | Hiv (6.0%)    | 66 (44)           | 379    |
| -2.0   | V (12.0%)                  | L/I (12.0%)   | A (6.0%)      | 66 (48)           | 147    |
| 5.0    | L/I (16.2%)                | m.A (11.2%)   | V (10.0%)     | 64 (41)           | 172    |
| 19.0   | L/I (23.6%)                | V (12.5%)     | P (11.1%)     | 61 (47)           | 190    |
| -30.0  | L/I (11.7%)                | A (7.8%)      | V (7.8%)      | 61 (42)           | 133    |
| -18.0  | L/I (12.3%)                | m.L/I (9.9%)  | F (7.4%)      | 61 (46)           | 517    |
| 13.0   | V (13.2%)                  | L/I (10.5%)   | P (9.2%)      | 60 (40)           | 156    |
| 34.0   | L/I (21.5%)                | P (19.0%)     | A (7.6%)      | 59 (41)           | 285    |
| -42.0  | L/I (15.3%)                | T (9.7%)      | A (6.9%)      | 57 (36)           | 386    |
| 23.0   | L/I (26.9%)                | m.A (10.3%)   | P (9.0%)      | 56 (40)           | 198    |
| 29.0   | L/I (16.0%)                | V (14.7%)     | P (8.0%)      | 55 (41)           | 139    |
| -12.0  | L/I (36.2%)                | P (14.5%)     | m.L/I (7.2%)  | 55 (40)           | 217    |
| -8.0   | L/I (17.4%)                | P (10.1%)     | T (7.2%)      | 55 (38)           | 129    |
| 44.0   | P (10.6%)                  | L/I (10.6%)   | m.A (9.1%)    | 54 (36)           | 335    |
| -95.1  | L/I (46.0%)                | P (20.6%)     | V (7.9%)      | 54 (39)           | 407    |
| -27.0  | L/I (17.1%)                | A (14.3%)     | P (11.4%)     | 54 (35)           | 210    |
| 2.0    | L/I (20.6%)                | P (11.8%)     | m.L/I (10.3%) | 52 (32)           | 295    |
| 4.0    | L/I (30.6%)                | m.L/I (12.9%) | F (6.5%)      | 51 (37)           | 102    |
| 17.0   | L/I (23.9%)                | m.L/I (9.9%)  | P (9.9%)      | 51 (34)           | 140    |
| -44.0  | L/I (15.5%)                | G (8.5%)      | P (7.0%)      | 51 (40)           | 255    |

| Offset | Top-3 residues (fractions) |               |               | # PNPs<br>(families) | # PSMs |
|--------|----------------------------|---------------|---------------|----------------------|--------|
|        | R1                         | R2            | R3            |                      |        |
| -29.0  | L/I (14.8%)                | E (9.3%)      | A (7.4%)      | 48 (36)              | 203    |
| 9.0    | L/I (20.8%)                | P (13.2%)     | V (9.4%)      | 47 (33)              | 77     |
| -81.1  | V (33.3%)                  | L/I (27.8%)   | P (13.0%)     | 47 (31)              | 247    |
| 20.0   | L/I (23.8%)                | P (14.3%)     | V (12.7%)     | 46 (32)              | 163    |
| -23.0  | P (20.0%)                  | L/I (12.0%)   | T (10.0%)     | 45 (36)              | 70     |
| -32.0  | L/I (16.7%)                | F (13.0%)     | Leuc (7.4%)   | 44 (37)              | 194    |
| -87.0  | F (11.8%)                  | S (11.8%)     | V (11.8%)     | 43 (36)              | 88     |
| 7.0    | L/I (23.5%)                | V (9.8%)      | F (7.8%)      | 42 (33)              | 63     |
| 37.0   | V (16.7%)                  | L/I (14.6%)   | m.A (12.5%)   | 42 (30)              | 132    |
| -34.0  | F (14.5%)                  | L/I (14.5%)   | P (7.3%)      | 42 (36)              | 636    |
| -26.0  | P (19.4%)                  | L/I (17.7%)   | A (6.5%)      | 42 (31)              | 305    |
| 45.0   | L/I (30.6%)                | P (10.2%)     | m.A (10.2%)   | 41 (30)              | 174    |
| -99.1  | L/I (31.4%)                | V (19.6%)     | m.L/I (13.7%) | 41 (35)              | 24638  |
| -56.0  | A (15.7%)                  | P (9.8%)      | T (7.8%)      | 41 (31)              | 199    |
| -57.0  | A (15.2%)                  | P (10.9%)     | G (8.7%)      | 41 (33)              | 78     |
| 26.0   | V (17.8%)                  | L/I (17.8%)   | T (8.9%)      | 40 (33)              | 187    |
| -6.1   | L/I (47.1%)                | m.L/I (13.7%) | V (3.9%)      | 40 (21)              | 96     |
| -72.0  | F (12.5%)                  | P (12.5%)     | L/I (12.5%)   | 40 (35)              | 1180   |
| -55.0  | A (10.6%)                  | W (10.6%)     | S (8.5%)      | 40 (34)              | 111    |
| -40.0  | V (15.6%)                  | A (11.1%)     | L/I (11.1%)   | 40 (31)              | 65     |
| -39.0  | L/I (18.8%)                | A (10.4%)     | m.L/I (6.2%)  | 40 (27)              | 78     |
| -38.0  | L/I (22.6%)                | P (16.1%)     | G (9.7%)      | 40 (29)              | 1917   |
| -36.0  | L/I (17.4%)                | Y (8.7%)      | V (6.5%)      | 40 (30)              | 79     |
| 10.0   | V (17.6%)                  | L/I (13.7%)   | m.L/I (9.8%)  | 39 (29)              | 134    |
| 43.0   | P (16.3%)                  | L/I (14.0%)   | A (11.6%)     | 39 (32)              | 69     |
| 46.0   | L/I (28.0%)                | P (14.0%)     | V (10.0%)     | 39 (30)              | 117    |
| 48.0   | L/I (15.6%)                | P (11.1%)     | V (11.1%)     | 39 (32)              | 430    |
| 50.0   | L/I (22.7%)                | A (11.4%)     | P (9.1%)      | 39 (28)              | 95     |
| -5.0   | L/I (18.0%)                | V (12.0%)     | m.L/I (8.0%)  | 39 (26)              | 3469   |
| 33.0   | L/I (23.4%)                | P (12.8%)     | A (8.5%)      | 38 (30)              | 527    |
| 64.0   | L/I (21.4%)                | m.L/I (11.9%) | P (9.5%)      | 38 (32)              | 64     |
| -43.0  | L/I (15.7%)                | A (9.8%)      | T (9.8%)      | 38 (27)              | 225    |
| -19.0  | P (12.2%)                  | m.L/I (10.2%) | T (8.2%)      | 37 (24)              | 157    |
| -11.0  | A (11.4%)                  | V (11.4%)     | m.A (9.1%)    | 37 (31)              | 78     |
| 27.0   | L/I (18.2%)                | V (11.4%)     | A (9.1%)      | 36 (32)              | 135    |
| 40.0   | L/I (19.1%)                | m.L/I (10.6%) | T (10.6%)     | 36 (27)              | 224    |
| -9.0   | L/I (26.7%)                | P (15.6%)     | m.L/I (8.9%)  | 36 (28)              | 91     |
| -113.1 | L/I (32.4%)                | F (13.5%)     | m.L/I (13.5%) | 36 (28)              | 151    |
| -84.0  | V (18.2%)                  | L/I (18.2%)   | P (11.4%)     | 36 (32)              | 88     |
| -53.0  | A (22.0%)                  | L/I (17.1%)   | P (9.8%)      | 36 (23)              | 292    |
| -22.0  | L/I (13.7%)                | P (11.8%)     | T (11.8%)     | 36 (30)              | 1748   |
| 11.0   | L/I (22.7%)                | V (13.6%)     | Q (11.4%)     | 35 (32)              | 230    |
| 24.0   | L/I (18.6%)                | P (14.0%)     | V (11.6%)     | 35 (27)              | 1905   |
| 35.0   | L/I (21.4%)                | P (19.0%)     | V (11.9%)     | 35 (27)              | 75     |
| 57.0   | L/I (29.3%)                | A (9.8%)      | F (7.3%)      | 35 (30)              | 322    |
| -109.1 | L/I (39.0%)                | m.L/I (19.5%) | F (7.3%)      | 35 (27)              | 127    |
| 131.1  | L/I (20.0%)                | P (17.5%)     | S (7.5%)      | 35 (27)              | 211    |
| -41.0  | L/I (16.0%)                | A (8.0%)      | P (8.0%)      | 35 (27)              | 468    |
| -46.0  | L/I (15.0%)                | F (12.5%)     | A (12.5%)     | 35 (29)              | 82     |
| 31.0   | L/I (20.5%)                | T (10.3%)     | m.L/I (7.7%)  | 34 (25)              | 94     |
| 52.0   | P (13.9%)                  | V (13.9%)     | L/I (13.9%)   | 34 (22)              | 47     |
| 56.0   | L/I (18.4%)                | V (12.2%)     | K (10.2%)     | 34 (22)              | 119    |
| 14.1   | V (46.3%)                  | L/I (19.5%)   | Thz (4.9%)    | 34 (20)              | 143    |
| 28.1   | E (20.0%)                  | A (12.5%)     | L/I (10.0%)   | 34 (17)              | 139    |
| -70.0  | V (14.0%)                  | A (11.6%)     | T (11.6%)     | 34 (29)              | 95     |
| -10.0  | P (14.6%)                  | L/I (14.6%)   | T (7.3%)      | 34 (27)              | 70     |

| Offset | Top-3 residues (fractions) |               |               | # PNPs<br>(families) | # PSMs |
|--------|----------------------------|---------------|---------------|----------------------|--------|
|        | R1                         | R2            | R3            |                      |        |
| -4.0   | L/I (18.6%)                | F (11.6%)     | V (11.6%)     | 34 (29)              | 109    |
| 66.0   | P (24.4%)                  | m.A (17.1%)   | L/I (9.8%)    | 33 (27)              | 76     |
| 7.9    | L/I (27.8%)                | m.L/I (13.9%) | V (11.1%)     | 33 (18)              | 50     |
| -48.0  | L/I (13.5%)                | m.F (13.5%)   | F (10.8%)     | 33 (30)              | 50     |
| -17.0  | L/I (14.6%)                | G (12.2%)     | F (7.3%)      | 33 (31)              | 63     |
| 59.0   | L/I (36.6%)                | m.L/I (12.2%) | A (9.8%)      | 32 (26)              | 105    |
| 70.0   | m.L/I (15.8%)              | L/I (13.2%)   | V (10.5%)     | 32 (27)              | 80     |
| -28.1  | L/I (24.3%)                | V (18.9%)     | m.L/I (16.2%) | 32 (21)              | 220    |
| 141.1  | L/I (15.4%)                | F (10.3%)     | V (10.3%)     | 32 (26)              | 121    |
| 113.1  | L/I (25.0%)                | S (16.7%)     | V (12.5%)     | 32 (22)              | 792    |
| -60.0  | P (11.6%)                  | L/I (11.6%)   | T (11.6%)     | 32 (27)              | 90     |
| -20.0  | L/I (17.5%)                | F (10.0%)     | P (10.0%)     | 32 (24)              | 55     |
| 3.0    | L/I (20.0%)                | m.L/I (17.1%) | P (8.6%)      | 31 (22)              | 53     |
| 38.0   | L/I (21.1%)                | m.L/I (13.2%) | P (10.5%)     | 31 (23)              | 97     |
| 47.0   | L/I (25.0%)                | V (20.0%)     | P (10.0%)     | 31 (26)              | 769    |
| 42.1   | L/I (25.6%)                | E (15.4%)     | V (12.8%)     | 31 (18)              | 73     |
| -100.1 | L/I (38.2%)                | m.L/I (14.7%) | F (8.8%)      | 31 (24)              | 70     |
| -42.1  | L/I (29.4%)                | m.L/I (8.8%)  | V (8.8%)      | 31 (21)              | 59     |
| -24.0  | L/I (12.8%)                | T (10.3%)     | Q (7.7%)      | 31 (28)              | 4865   |
| -21.0  | NMA (9.5%)                 | F (7.1%)      | P (7.1%)      | 31 (24)              | 200    |
| 62.0   | A (12.2%)                  | P (12.2%)     | m.L/I (9.8%)  | 30 (26)              | 169    |
| 91.0   | L/I (19.4%)                | m.L/I (16.1%) | P (16.1%)     | 30 (25)              | 61     |
| -111.1 | L/I (37.1%)                | m.L/I (34.3%) | Y (2.9%)      | 30 (21)              | 374    |
| -69.0  | A (14.3%)                  | L/I (14.3%)   | m.L/I (11.4%) | 30 (24)              | 63     |
| -67.0  | A (14.6%)                  | L/I (12.2%)   | V (9.8%)      | 30 (27)              | 71     |

**Supplementary Table 5.** Distribution of  $SPCScore(P_{known}, S)$  in the brute-force method PSMs. Values in cells are the number of PSMs reported by the brute-force method at the specified significance level and with the stated number of shared peaks ( $\eta$ ).

| P-value                                    | $\eta \leq 1$ | $\eta = 2$ | $\eta = 3$ | $\eta = 4$ | $\eta \geq 5$ |
|--------------------------------------------|---------------|------------|------------|------------|---------------|
| <i>Spectra<sub>PSEUD</sub></i>             |               |            |            |            |               |
| $10^{-5}$                                  | 144           | 461        | 1440       | 2594       | 12832         |
| $10^{-10}$                                 | 67            | 157        | 572        | 1188       | 5561          |
| $10^{-15}$                                 | 0             | 6          | 20         | 129        | 1728          |
| <i>Spectra<sub>STREP<sub>1</sub></sub></i> |               |            |            |            |               |
| $10^{-5}$                                  | 196           | 635        | 1658       | 2654       | 9947          |
| $10^{-10}$                                 | 28            | 64         | 195        | 249        | 2112          |
| $10^{-15}$                                 | 1             | 0          | 7          | 16         | 624           |
| <i>Spectra<sub>STREP<sub>2</sub></sub></i> |               |            |            |            |               |
| $10^{-5}$                                  | 68            | 181        | 361        | 536        | 1528          |
| $10^{-10}$                                 | 2             | 10         | 25         | 36         | 185           |
| $10^{-15}$                                 | 0             | 0          | 1          | 1          | 51            |

**Supplementary Table 6.** Estimation of FDR using various decoy ratios. Decoy ratio  $D$  is defined as a fraction of the decoy database size to the target database size. For all datasets FDR is computed for VarQuest identifications with the specified significance level and specified in %. *Time* stands for the total computation time on a 12 CPU Intel Xeon X7560 2.27GHz cluster node. Decoy ratio equals to 1 gives rather good estimate of FDR in comparison to more accurate values at  $D = 10$ , the absolute difference in the values is within 1-2% in the most cases. At the same time, the overall computation is 1.5 times faster with  $D = 1$  than with  $D = 10$ , so we choose  $D = 1$  for our benchmarks.

| <i>P</i> -value                             | $D = 1$ | $D = 5$ | $D = 10$ |
|---------------------------------------------|---------|---------|----------|
| <i>Spectra</i> <sub>PSEUD</sub>             |         |         |          |
| $\leq 10^{-10}$                             | 3.2     | 3.0     | 3.0      |
| $\leq 10^{-15}$                             | 1.8     | 1.5     | 1.5      |
| Time (hh:mm)                                | 3:17    | 3:53    | 4:16     |
| <i>Spectra</i> <sub>STREP<sub>1</sub></sub> |         |         |          |
| $\leq 10^{-10}$                             | 6.2     | 5.7     | 4.7      |
| $\leq 10^{-15}$                             | 1.9     | 3.8     | 3.3      |
| Time (hh:mm)                                | 4:41    | 5:48    | 7:31     |
| <i>Spectra</i> <sub>STREP<sub>2</sub></sub> |         |         |          |
| $\leq 10^{-10}$                             | 8.5     | 5.9     | 6.1      |
| $\leq 10^{-15}$                             | 3.6     | 3.0     | 3.7      |
| Time (hh:mm)                                | 1:37    | 1:55    | 2:26     |

**Supplementary Table 7.** Estimation of FDR using various decoy generation strategies. *Classical* stands for shuffling of amino acids in the fixed PNP structure, *DEREPLICATOR* is for rearrangement of the PNP mass between its nodes, and *VarQuest* is for shuffling of amino acids and displacement of one random edge. *Experiment 1* is VarQuest run on a highly reliable spectral dataset against the full PNP database (expected FDR is 0%). *Experiment 2* is VarQuest run on the same spectral dataset against the reduced PNP database without “correct” peptides and all their known variants (expected FDR is 50%). FDR is given in percentage.

| Strategy            | <i>Experiment 1</i> | <i>Experiment 2</i> |
|---------------------|---------------------|---------------------|
| <i>Classical</i>    | 7.5                 | 63.0                |
| <i>DEREPLICATOR</i> | 0.0                 | 2.0                 |
| <i>VarQuest</i>     | 0.5                 | 55.0                |
| Expected            | 0.0                 | 50.0                |

**Supplementary Table 8.** Number of compounds with the specified number of generalized peptide bonds in AntiMarin [3], DNP [2], MIBiG [4], StreptomeDB [5] and the combined database, denoted as *Combined*. *Initial* DB size is the number of compounds downloaded from the corresponding database website, *Filtered* DB size is the number of compounds after removing isomeric molecules and structures with more than one connected component. *Combined* database does not include peptides with less than 4 bonds. *Class* stands for the automatic taxonomy of compounds with ClassyFire [6] software tool: *none* is for unclassified molecules; *peptidic* is for structures reported as Amino acids, peptides, and analogues, Depsipeptides, Hybrid peptides, Peptoid-peptide hybrids, or Polypeptides; *other* is for all other chemical classes (non peptidic). ClassyFire was run on compounds with at least 4 generalized peptide bonds in each database.

| Database        | DB size |          | Compounds with # bonds |      |      |      |          | Class ( $\geq 4$ bonds) |          |       |
|-----------------|---------|----------|------------------------|------|------|------|----------|-------------------------|----------|-------|
|                 | Initial | Filtered | $\leq 2$               | 3    | 4    | 5    | $\geq 6$ | none                    | peptidic | other |
| AntiMarin       | 60908   | 47654    | 39611                  | 2238 | 1402 | 674  | 3729     | 424                     | 4121     | 1260  |
| DNP             | 254735  | 185546   | 167112                 | 8155 | 4122 | 1958 | 4199     | 1903                    | 3421     | 4955  |
| MIBiG           | 963     | 888      | 611                    | 55   | 33   | 15   | 174      | 47                      | 69       | 106   |
| StreptomeDB     | 3992    | 3554     | 2909                   | 225  | 94   | 77   | 249      | 102                     | 83       | 235   |
| <i>Combined</i> | -       | 10067    | -                      | -    | 3244 | 1592 | 4663     | 701                     | 5021     | 4345  |

**Supplementary Table 9.** Classification of PNPs and PNP families in the PNPdatabase. *Class* refers to chemical class reported by ClassyFire [6]. *# PNPs (families)* stands for the number of PNPs (PNP families) in the PNPdatabase. *# identified PNPs (families)* is the number of PNPs (PNP families) identified by the standard identification algorithm (Standard) and VarQuest in *Spectra<sub>GNPS</sub>* at 5% FDR. *Total* number of families does not sum up because in a few cases PNPs from different chemical classes may form a single PNP family.

| Class                      | # PNPs (families) | # identified PNPs (families) |            |
|----------------------------|-------------------|------------------------------|------------|
|                            |                   | Standard                     | VarQuest   |
| Amino acids, peptides, etc | 2219 (900)        | 114 (64)                     | 630 (307)  |
| Depsipeptides              | 1541 (372)        | 204 (68)                     | 907 (242)  |
| Hybrid peptides            | 656 (168)         | 37 (15)                      | 183 (50)   |
| Peptoid-peptide hybrids    | 37 (5)            | 18 (1)                       | 34 (4)     |
| Polypeptides               | 568 (244)         | 47 (9)                       | 271 (91)   |
| <i>Total</i>               | 5021 (1582)       | 420 (143)                    | 2025 (648) |



**Supplementary Table 10.** Distribution of PNP origins in the PNPdatabase. *Collection* refers to originating collection where PNPs were taken from (AntiMarin [3], DNP [2], MIBiG [4], and StreptomeDB [5] or their various combination). *# PNPs (families)* stands for the number of PNPs (PNP families) in the PNPdatabase. *# identified PNPs (families)* stands for the number of PNPs (PNP families) identified by the standard identification algorithm (Standard) and VarQuest in *Spectra<sub>GNPS</sub>* at 5% FDR. *Total* number of families does not sum up because in some cases PNPs from different collections may form a single PNP family. All rows are exclusive, e.g. *# PNPs* in “Antimarin” counts the number of PNPs present in AntiMarin only and not present in 3 other databases, while *# PNPs* in “Antimarin and MIBiG” counts the number of PNPs present simultaneously in AntiMarin and MIBiG but absent in 2 other databases.

| Collection                | # PNPs (families) | # identified PNPs (families) |            |
|---------------------------|-------------------|------------------------------|------------|
|                           |                   | Standard                     | VarQuest   |
| AntiMarin                 | 1518 (662)        | 134 (48)                     | 647 (268)  |
| MIBiG                     | 69 (49)           | 1 (1)                        | 17 (14)    |
| DNP                       | 1653 (587)        | 114 (57)                     | 599 (245)  |
| StreptomeDB               | 132 (58)          | 6 (2)                        | 42 (22)    |
| AntiMarin and DNP         | 1470 (551)        | 140 (58)                     | 668 (252)  |
| AntiMarin and MIBiG       | 4 (4)             | 1 (1)                        | 2 (2)      |
| AntiMarin and StreptomeDB | 32 (15)           | 4 (2)                        | 8 (6)      |
| DNP and MIBiG             | 6 (5)             | 0 (0)                        | 2 (2)      |
| DNP and StreptomeDB       | 6 (5)             | 4 (3)                        | 4 (3)      |
| MIBiG and StreptomeDB     | 5 (2)             | 0 (0)                        | 0 (0)      |
| All except StreptomeDB    | 32 (29)           | 5 (4)                        | 15 (13)    |
| All except MIBiG          | 71 (44)           | 6 (4)                        | 16 (12)    |
| All except DNP            | 3 (3)             | 0 (0)                        | 0 (0)      |
| All except AntiMarin      | 1 (1)             | 0 (0)                        | 0 (0)      |
| All four                  | 19 (17)           | 5 (5)                        | 5 (5)      |
| <i>Total</i>              | 5021 (1582)       | 420 (143)                    | 2025 (648) |

**Supplementary Table 11.** Distribution of PNP family sizes in the PNPdatabase (5021 PNPs from 1582 PNP families). *# PNP families* stands for the number of PNP families containing *Size* distinct compounds. *# identified (complete)* is the number of PNP families having at least one member (or all members) identified by the standard identification algorithm (Standard) and VarQuest in *Spectra<sub>GNPS</sub>* at 5% FDR

| Size  | # PNP families | # identified (complete) |           |
|-------|----------------|-------------------------|-----------|
|       |                | Standard                | VarQuest  |
| 1     | 976            | 26 (26)                 | 296 (296) |
| 2     | 225            | 26 (13)                 | 111 (76)  |
| 3     | 86             | 16 (2)                  | 54 (27)   |
| 4     | 64             | 8 (0)                   | 35 (17)   |
| 5     | 46             | 13 (0)                  | 24 (13)   |
| 6–10  | 97             | 22 (1)                  | 66 (22)   |
| 11–20 | 54             | 17 (0)                  | 37 (7)    |
| 21–30 | 12             | 6 (0)                   | 10 (1)    |
| ≥ 31  | 22             | 9 (0)                   | 15 (3)    |

**Supplementary Table 12.** Distribution of PNP structures in the PNPdatabase. *Structure* refers to structure of chemical compound (linear, cyclic, branch-cyclic, and all others referred as *complex*). *# PNP*s (*families*) stands for the number of PNPs (PNP families) in the PNPdatabase. *# identified PNP*s (*families*) is the number of PNPs (PNP families) identified by the standard identification algorithm (Standard) and VarQuest in *Spectra<sub>GNPS</sub>* at 5% FDR. Structures for families are calculated based on a family member with median mass.

| Structure     | # PNP      | # identified PNP |           |
|---------------|------------|------------------|-----------|
|               |            | Standard         | VarQuest  |
| linear        | 1265 (450) | 90 (25)          | 333 (109) |
| cyclic        | 1257 (387) | 209 (70)         | 903 (305) |
| branch-cyclic | 1250 (279) | 100 (42)         | 605 (170) |
| complex       | 1249 (466) | 21 (6)           | 184 (64)  |

**Supplementary Table 13.** Distribution of the number of the generalized peptide bonds in PNPs in the PNPdatabase. *# bonds* stands for the number of generalized peptide bonds. *# PNP*s (*families*) stands for the number of PNPs (PNP families) in the PNPdatabase. *# identified PNP*s (*families*) stands for the number of PNPs (PNP families) identified by the standard identification algorithm (Standard) and VarQuest in *Spectra<sub>GNPS</sub>* at 5% FDR. The number of bonds for families is computed based on a family member with median mass.

| # bonds | # PNP     | # identified PNP |           |
|---------|-----------|------------------|-----------|
|         |           | Standard         | VarQuest  |
| 4       | 790 (282) | 6 (6)            | 40 (21)   |
| 5       | 422 (126) | 20 (8)           | 96 (36)   |
| 6       | 619 (215) | 63 (23)          | 249 (78)  |
| 7       | 678 (213) | 39 (21)          | 328 (120) |
| 8       | 622 (183) | 72 (25)          | 304 (110) |
| 9       | 360 (121) | 21 (5)           | 165 (66)  |
| 10      | 336 (78)  | 50 (13)          | 168 (47)  |
| 11      | 220 (52)  | 63 (9)           | 169 (36)  |
| 12      | 230 (56)  | 23 (10)          | 133 (30)  |
| 13      | 108 (39)  | 6 (4)            | 51 (25)   |
| 14      | 134 (47)  | 6 (5)            | 81 (20)   |
| 15      | 85 (30)   | 6 (4)            | 31 (9)    |
| 16      | 53 (11)   | 9 (4)            | 32 (8)    |
| 17      | 21 (14)   | 1 (1)            | 9 (8)     |
| 18      | 100 (14)  | 19 (2)           | 70 (8)    |
| 19      | 65 (26)   | 4 (2)            | 24 (10)   |
| ≥ 20    | 178 (75)  | 12 (1)           | 75 (16)   |

**Supplementary Table 14.** Most frequent residues in the PNPdatabase. Chemical formulas and fractions for top 50 most frequent residues are shown. AA is 1-letter amino acid code for chemical formulas matching standard amino acids or their methylated forms (prefixed with “m.”). *Mass* is residue monoisotopic mass (in Da). *Fraction* of a residue *per compounds* is the number of PNPs (families) containing this residue at least once divided by the total number of PNPs (families). *Fraction* of a residue *per all amino acids* is the total number of this residue (may be present multiple times in a single PNP) divided by the total number of residues in all PNPs (families). Fractions for families are calculated based on a family member with median mass. Common fragments  $C_2H_3O$ ,  $CO$ ,  $NH$ , etc. correspond the components of the PNP graph formed by break of N-C bonds of sides chains such as acetyl ( $C_2H_3O$ ), carboxyl ( $CO$ ) and nitrogen.

| Formula              | AA    | Mass  | Fraction (%)  |          |                     |          |
|----------------------|-------|-------|---------------|----------|---------------------|----------|
|                      |       |       | per compounds |          | per all amino acids |          |
|                      |       |       | PNPs          | Families | PNPs                | Families |
| $C_6H_{11}ON$        | L/I   | 113.1 | 46.15         | 45.20    | 9.63                | 9.49     |
| $C_3H_5ON$           | A     | 71.0  | 35.99         | 32.11    | 6.82                | 6.38     |
| $C_5H_9ON$           | V     | 99.1  | 33.86         | 33.75    | 6.01                | 6.01     |
| $C_4H_7O_2N$         | T     | 101.0 | 30.95         | 28.57    | 4.75                | 4.69     |
| $C_5H_7ON$           | P     | 97.1  | 27.44         | 28.57    | 4.29                | 4.93     |
| $C_2H_3ON$           | G     | 57.0  | 24.16         | 28.13    | 4.46                | 6.30     |
| $C_3H_5O_2N$         | S     | 87.0  | 22.39         | 25.73    | 3.90                | 4.45     |
| $C_9H_9ON$           | F     | 147.1 | 17.51         | 20.80    | 2.46                | 3.05     |
| $C_4H_7ON$           | m.A   | 85.1  | 14.84         | 8.41     | 5.66                | 2.34     |
| $C_5H_8O_2N_2$       | Q     | 128.1 | 12.99         | 12.52    | 2.32                | 1.95     |
| $C_4H_6O_2N_2$       | N     | 114.0 | 11.79         | 16.18    | 1.83                | 2.60     |
| $C_5H_7O_3N$         | E     | 129.0 | 11.35         | 11.44    | 1.69                | 1.74     |
| $C_6H_{12}ON_2$      | K     | 128.1 | 10.93         | 13.53    | 1.93                | 2.62     |
| $C_2H_3O$            | -     | 43.0  | 10.64         | 8.66     | 1.39                | 1.28     |
| $C_9H_9O_2N$         | Y     | 163.1 | 10.56         | 14.66    | 1.56                | 2.25     |
| $C_4H_5O_3N$         | D     | 115.0 | 10.36         | 12.77    | 1.62                | 1.99     |
| $C_7H_{13}ON$        | m.L/I | 127.1 | 8.78          | 7.40     | 1.64                | 1.19     |
| $CO$                 | -     | 28.0  | 7.87          | 4.42     | 1.09                | 0.55     |
| $C_{11}H_{10}ON_2$   | W     | 186.1 | 7.83          | 8.98     | 1.07                | 1.24     |
| $C_6H_{12}ON_4$      | R     | 156.1 | 6.95          | 9.67     | 1.03                | 1.61     |
| $C_4HONS$            | -     | 111.0 | 6.19          | 5.25     | 1.02                | 1.02     |
| $C_4H_5ON$           | -     | 83.0  | 5.44          | 5.06     | 0.77                | 0.76     |
| $C_{10}H_{11}ON$     | m.F   | 161.1 | 5.12          | 4.74     | 0.68                | 0.68     |
| $C_6H_9ON$           | m.P   | 111.1 | 4.48          | 2.53     | 0.65                | 0.40     |
| $HN$                 | -     | 15.0  | 4.06          | 1.26     | 0.48                | 0.17     |
| $C_5H_{10}ON_2$      | -     | 114.1 | 4.06          | 2.91     | 0.55                | 0.39     |
| $C_{10}H_{11}O_2N$   | m.Y   | 177.1 | 3.96          | 2.34     | 0.49                | 0.28     |
| $C_5H_7O_2N$         | -     | 113.0 | 3.92          | 2.40     | 0.57                | 0.36     |
| $C_6H_{10}O_2$       | -     | 114.1 | 3.70          | 2.21     | 0.49                | 0.36     |
| $C_6H_{11}O_2N$      | -     | 129.1 | 3.70          | 1.96     | 0.49                | 0.26     |
| $C_4H_5O_4N$         | -     | 131.0 | 3.37          | 2.72     | 0.46                | 0.36     |
| $CH_3O$              | -     | 31.0  | 3.25          | 4.68     | 0.43                | 0.59     |
| $C_5H_9O_2N$         | m.T   | 115.1 | 3.09          | 1.96     | 0.38                | 0.26     |
| $C_5H_8O_2$          | -     | 100.1 | 2.93          | 3.73     | 0.53                | 0.71     |
| $C_5H_9ONS$          | M     | 131.0 | 2.87          | 6.26     | 0.39                | 0.86     |
| $C_4H_8ON_2$         | -     | 100.1 | 2.85          | 2.15     | 0.68                | 0.41     |
| $CH_2ON$             | -     | 44.0  | 2.73          | 1.33     | 0.32                | 0.15     |
| $C_6H_7ON_3$         | H     | 137.1 | 2.57          | 4.42     | 0.33                | 0.57     |
| $C_3HNS$             | -     | 83.0  | 2.51          | 1.64     | 0.31                | 0.25     |
| $CHO$                | -     | 29.0  | 2.47          | 2.15     | 0.29                | 0.25     |
| $C_2H_5N$            | -     | 43.0  | 2.29          | 2.15     | 0.28                | 0.28     |
| $C_{13}H_{11}O_3N_3$ | -     | 257.1 | 2.21          | 1.64     | 0.26                | 0.19     |
| $C_5H_9ON_2$         | -     | 113.1 | 2.21          | 1.45     | 0.27                | 0.19     |

| Formula              | AA | Mass  | Fraction (%)  |          |                     |          |
|----------------------|----|-------|---------------|----------|---------------------|----------|
|                      |    |       | per compounds |          | per all amino acids |          |
|                      |    |       | PNPs          | Families | PNPs                | Families |
| $C_{11}H_{13}O_2N$   | -  | 191.1 | 2.15          | 1.14     | 0.26                | 0.14     |
| $C_5H_9O_2N_2$       | -  | 129.1 | 2.15          | 2.34     | 0.25                | 0.27     |
| $C_3H_3ON$           | -  | 69.0  | 2.13          | 2.28     | 0.44                | 0.44     |
| $C_{12}H_{18}O_3N_7$ | -  | 308.1 | 2.11          | 0.38     | 0.24                | 0.04     |
| $C_6H_{10}O_3N_2$    | -  | 158.1 | 2.09          | 1.01     | 0.43                | 0.17     |
| $C_7H_{12}O_3N_2$    | -  | 172.1 | 2.07          | 1.64     | 0.32                | 0.23     |
| $C_6H_{14}ON$        | -  | 116.1 | 2.01          | 0.88     | 0.23                | 0.10     |
| Total entries        |    |       | 5021          | 1582     | 43385               | 13760    |

**Supplementary Table 15.** Peptide variants identified by VarQuest in the search of *SpectraPSEUD*, *SpectraSTREP<sub>1</sub>* and *SpectraSTREP<sub>2</sub>* against the PNPdatabase. Identifications of known PNPs (zero offset and isotopic shifts) are not shown. *Peptide* refers to a known PNP, *Offset* is identified modification mass and the amino acid corresponding to the most likely location of the modification in a PNP graph. *M* stands for suggested modification or mutation type: “I” for insertion, “D” for deletion, “?” indicates uncertainty (modification mass does not match standard amino acid masses), “!” shows high confidence in predicting a deletion (negative modification mass exactly matches the mass of an amino acid). *Mass* is the total variant PNP monoisotopic mass (in Da). *Sc* stands for SPCScore. *Strain* column indicates a specific Pseudomonas (*SpectraPSEUD*), or Streptomyces (*SpectraSTREP<sub>1</sub>* and *SpectraSTREP<sub>2</sub>*) strain associated with spectra file, “N/A” stands for unknown strand. In *SN* column “+” indicates that the variant was identified by SpecNets and “-” otherwise. The boldfaced and underlined PSMs are analyzed in details (## 44, 139, and 227). PNPs with complex names are abbreviated with “\*N” suffix and described in details in Supplementary Table 18. Abbreviations (in addition to standard amino acid identifiers): m.X for methylated version of X amino acid, lt for lipid tail, the rest are explained in details in Supplementary Table 19.

| #                                                               | Peptide                     | Offset            | M | Mass   | P-value               | Sc | Strain                | SN |
|-----------------------------------------------------------------|-----------------------------|-------------------|---|--------|-----------------------|----|-----------------------|----|
| <i>SpectraPSEUD</i>                                             |                             |                   |   |        |                       |    |                       |    |
| PNP family: Orfamides; Producer: Pseudomonas [7]                |                             |                   |   |        |                       |    |                       |    |
| 1                                                               | Orfamide A                  | <i>V</i> + 14.0   | - | 1308.9 | $1.5 \times 10^{-28}$ | 19 | <i>P. sp. LCBR</i>    | +  |
| 2                                                               | Orfamide A                  | <i>V</i> + 17.0   | - | 1311.9 | $6.8 \times 10^{-21}$ | 15 | <i>P. sp. LCBR</i>    | +  |
| 3                                                               | Orfamide A                  | <i>lt</i> + 26.0  | - | 1320.9 | $2.5 \times 10^{-19}$ | 16 | <i>P. sp. LCBR</i>    | -  |
| 4                                                               | Orfamide A                  | <i>lt</i> + 28.0  | - | 1322.9 | $7.8 \times 10^{-21}$ | 18 | <i>P. sp. LCBR</i>    | +  |
| 5                                                               | Orfamide A* <sup>1</sup>    | <i>V</i> + 28.0   | - | 1308.9 | $1.1 \times 10^{-17}$ | 14 | <i>P. sp. LCBR</i>    | +  |
| 6                                                               | Orfamide B                  | <i>T</i> - 18.0   | - | 1280.8 | $1.1 \times 10^{-23}$ | 9  | <i>P. sp. LCBR</i>    | +  |
| 7                                                               | Orfamide B                  | <i>V</i> - 4.0    | - | 1294.8 | $1.0 \times 10^{-27}$ | 11 | <i>P. sp. LCBR</i>    | +  |
| PNP family: Xantholysins and similar; Producer: Pseudomonas [8] |                             |                   |   |        |                       |    |                       |    |
| 8                                                               | Antib. MA026                | <i>L/I</i> + 1.0  | - | 1776.1 | $3.7 \times 10^{-18}$ | 9  | <i>P. fluorescens</i> | +  |
| 9                                                               | Antib. MA026                | <i>V</i> + 12.1   | - | 1787.1 | $4.3 \times 10^{-18}$ | 14 | <i>P. fluorescens</i> | -  |
| 10                                                              | Antib. MA026                | <i>L/I</i> + 23.0 | - | 1798.1 | $1.1 \times 10^{-18}$ | 9  | <i>P. fluorescens</i> | -  |
| 11                                                              | Xantholysin A* <sup>1</sup> | <i>V</i> + 12.1   | - | 1773.1 | $9.7 \times 10^{-20}$ | 16 | <i>P. sp. BW18</i>    | +  |
| 12                                                              | Xantholysin A* <sup>1</sup> | <i>L/I</i> + 14.1 | - | 1775.2 | $2.1 \times 10^{-21}$ | 12 | <i>P. fluorescens</i> | +  |
| 13                                                              | Xantholysin A* <sup>1</sup> | <i>V</i> + 15.1   | - | 1776.1 | $1.2 \times 10^{-22}$ | 15 | <i>P. fluorescens</i> | +  |
| 14                                                              | Xantholysin A* <sup>2</sup> | <i>L/I</i> - 10.9 | - | 1790.2 | $1.1 \times 10^{-19}$ | 13 | <i>P. sp. BW18</i>    | -  |
| 15                                                              | Xantholysin A* <sup>2</sup> | <i>L/I</i> + 5.1  | - | 1806.2 | $1.6 \times 10^{-19}$ | 17 | <i>P. fluorescens</i> | -  |
| 16                                                              | Xantholysin A* <sup>2</sup> | <i>lt</i> + 12.0  | - | 1813.1 | $5.0 \times 10^{-24}$ | 14 | <i>P. fluorescens</i> | -  |
| 17                                                              | Xantholysin A               | <i>L/I</i> + 8.0  | - | 1783.1 | $1.4 \times 10^{-20}$ | 11 | <i>P. fluorescens</i> | -  |
| 18                                                              | Xantholysin A               | <i>L/I</i> + 12.0 | - | 1787.1 | $2.5 \times 10^{-25}$ | 15 | <i>P. fluorescens</i> | -  |
| 19                                                              | Xantholysin A               | <i>L/I</i> + 14.1 | - | 1789.2 | $2.8 \times 10^{-18}$ | 15 | <i>P. fluorescens</i> | -  |
| 20                                                              | Xantholysin A               | <i>L/I</i> + 15.1 | - | 1790.2 | $4.7 \times 10^{-19}$ | 14 | <i>P. fluorescens</i> | -  |
| PNP family: Tolaasins; Producer: Pseudomonas [9]                |                             |                   |   |        |                       |    |                       |    |
| 21                                                              | Tolaasin* <sup>1</sup>      | <i>L/I</i> - 3.0  | - | 2001.2 | $3.8 \times 10^{-24}$ | 14 | <i>P. tolaasii</i>    | +  |
| 22                                                              | Tolaasin B                  | <i>T</i> + 14.0   | - | 1986.2 | $3.9 \times 10^{-32}$ | 18 | <i>P. tolaasii</i>    | +  |
| 23                                                              | Tolaasin B                  | <i>K</i> + 15.0   | - | 1987.2 | $3.4 \times 10^{-25}$ | 17 | <i>P. tolaasii</i>    | +  |
| 24                                                              | Tolaasin D                  | <i>V</i> + 15.0   | - | 2001.2 | $2.2 \times 10^{-23}$ | 16 | <i>P. tolaasii</i>    | +  |
| 25                                                              | Tolaasin D                  | <i>V</i> + 18.0   | - | 2004.2 | $8.4 \times 10^{-35}$ | 17 | <i>P. tolaasii</i>    | +  |
| 26                                                              | Tolaasin D                  | <i>V</i> + 19.0   | - | 2005.2 | $3.6 \times 10^{-26}$ | 16 | <i>P. tolaasii</i>    | +  |
| 27                                                              | Tolaasin D                  | <i>L/I</i> + 23.0 | - | 2009.2 | $8.4 \times 10^{-23}$ | 13 | <i>P. tolaasii</i>    | +  |
| 28                                                              | Tolaasin D                  | <i>L/I</i> + 28.0 | - | 2014.2 | $2.1 \times 10^{-23}$ | 16 | <i>P. tolaasii</i>    | -  |

| #                                                                             | Peptide                    | Offset              | M  | Mass   | P-value               | Sc | Strain                | SN |
|-------------------------------------------------------------------------------|----------------------------|---------------------|----|--------|-----------------------|----|-----------------------|----|
| 29                                                                            | Tolaasin D                 | $V + 29.0$          | -  | 2015.2 | $1.2 \times 10^{-22}$ | 15 | <i>P. tolaasii</i>    | +  |
| 30                                                                            | Tolaasin II                | $Q + 31.0$          | -  | 1973.2 | $2.8 \times 10^{-27}$ | 15 | <i>P. tolaasii</i>    | +  |
| 31                                                                            | Tolaasin II                | $\Delta But + 44.0$ | -  | 1986.2 | $5.4 \times 10^{-29}$ | 13 | <i>P. tolaasii</i>    | +  |
| 32                                                                            | Tolaasin II                | $V + 73.0$          | I? | 2015.2 | $1.3 \times 10^{-17}$ | 13 | <i>P. tolaasii</i>    | +  |
| PNP family: Putisolivins; Producer: <i>Pseudomonas</i> [10]                   |                            |                     |    |        |                       |    |                       |    |
| 33                                                                            | Putisolvin I* <sup>1</sup> | $S - 14.0$          | -  | 1379.8 | $4.9 \times 10^{-45}$ | 18 | <i>P. putida</i>      | +  |
| 34                                                                            | Putisolvin I* <sup>1</sup> | $S + 8.0$           | -  | 1401.8 | $7.1 \times 10^{-23}$ | 11 | <i>P. putida</i>      | +  |
| 35                                                                            | Putisolvin I* <sup>1</sup> | $S + 22.0$          | -  | 1415.8 | $3.2 \times 10^{-31}$ | 14 | <i>P. putida</i>      | -  |
| 36                                                                            | Putisolvin I               | $S + 14.0$          | -  | 1393.8 | $2.6 \times 10^{-35}$ | 17 | <i>P. putida</i>      | +  |
| 37                                                                            | Putisolvin I               | $S + 17.0$          | -  | 1396.9 | $3.6 \times 10^{-27}$ | 13 | <i>P. putida</i>      | +  |
| 38                                                                            | Putisolvin I               | $S + 18.0$          | -  | 1397.8 | $4.1 \times 10^{-35}$ | 16 | <i>P. putida</i>      | +  |
| 39                                                                            | Putisolvin I               | $S + 19.0$          | -  | 1398.8 | $4.8 \times 10^{-21}$ | 9  | <i>P. putida</i>      | -  |
| 40                                                                            | Putisolvin I               | $S + 22.0$          | -  | 1401.8 | $7.7 \times 10^{-32}$ | 16 | <i>P. putida</i>      | -  |
| 41                                                                            | Putisolvin I               | $S + 36.0$          | -  | 1415.8 | $1.9 \times 10^{-27}$ | 14 | <i>P. putida</i>      | -  |
| 42                                                                            | Putisolvin I               | $S + 40.0$          | -  | 1419.8 | $2.7 \times 10^{-21}$ | 15 | <i>P. putida</i>      | -  |
| PNP family: Massetolides; Producer: <i>Pseudomonas</i> [11, 12]               |                            |                     |    |        |                       |    |                       |    |
| 43                                                                            | Massetolide* <sup>1</sup>  | $lt + 141.1$        | I? | 1308.9 | $3.0 \times 10^{-18}$ | 14 | <i>P. sp. LCBR</i>    | +  |
| 44                                                                            | <b>Massetolide A</b>       | $L/I + 113.1$       | I  | 1252.8 | $4.2 \times 10^{-19}$ | 19 | <i>P. synxantha</i>   | +  |
| 45                                                                            | Massetolide E              | $V + 14.0$          | -  | 1125.7 | $3.4 \times 10^{-20}$ | 14 | <i>P. putida</i>      | +  |
| 46                                                                            | Massetolide F              | $L/I + 14.0$        | -  | 1139.7 | $9.0 \times 10^{-25}$ | 16 | <i>P. fluorescens</i> | +  |
| 47                                                                            | Massetolide F              | $L/I + 18.0$        | -  | 1143.7 | $5.9 \times 10^{-22}$ | 9  | <i>P. sp. PGSB</i>    | -  |
| 48                                                                            | Massetolide F              | $lt + 26.0$         | -  | 1151.7 | $7.2 \times 10^{-19}$ | 16 | <i>P. fluorescens</i> | +  |
| 49                                                                            | Massetolide G              | $lt + 14.0$         | -  | 1153.7 | $1.2 \times 10^{-19}$ | 18 | <i>P. fluorescens</i> | +  |
| 50                                                                            | Pseudodesmin B             | $V + 15.0$          | -  | 1125.7 | $1.0 \times 10^{-17}$ | 12 | <i>P. fluorescens</i> | +  |
| 51                                                                            | Massetolide I              | $L/I + 28.0$        | -  | 1139.7 | $5.2 \times 10^{-19}$ | 14 | <i>P. fluorescens</i> | +  |
| Singletons; Producers: <i>Pseudomonas</i> [13]                                |                            |                     |    |        |                       |    |                       |    |
| 52                                                                            | Amphisin                   | $D + 14.0$          | -  | 1408.8 | $5.3 \times 10^{-19}$ | 18 | <i>P. fluorescens</i> | +  |
| PNP family: Surfactins and similar; Producer: <i>Bacillus</i> [14–16]         |                            |                     |    |        |                       |    |                       |    |
| 53                                                                            | Pumilacidin F              | $L/I - 14.0$        | -  | 1035.7 | $4.0 \times 10^{-19}$ | 14 | <i>P. fluorescens</i> | +  |
| 54                                                                            | Esperin                    | $E - 14.0$          | -  | 1021.7 | $2.7 \times 10^{-19}$ | 18 | <i>P. reactans</i>    | +  |
| 55                                                                            | Esperin                    | $V + 14.0$          | -  | 1049.7 | $4.7 \times 10^{-20}$ | 16 | <i>P. rhodesiae</i>   | +  |
| 56                                                                            | Lipopeptide NO             | $E + 42.0$          | -  | 1035.7 | $1.1 \times 10^{-19}$ | 19 | <i>P. reactans</i>    | +  |
| 57                                                                            | Surfactin* <sup>1</sup>    | $CH_2 - 14.0$       | -  | 1035.7 | $7.3 \times 10^{-23}$ | 20 | <i>P. rhodesiae</i>   | +  |
| 58                                                                            | Surfactin* <sup>2</sup>    | $L/I + 18.0$        | -  | 1053.7 | $1.3 \times 10^{-19}$ | 9  | <i>P. reactans</i>    | -  |
| 59                                                                            | Surfactin B1               | $L/I + 18.0$        | -  | 1039.7 | $1.4 \times 10^{-27}$ | 11 | <i>P. reactans</i>    | -  |
| 60                                                                            | Surfactin C1               | $L/I + 18.0$        | -  | 1053.7 | $5.9 \times 10^{-26}$ | 16 | <i>P. reactans</i>    | -  |
| 61                                                                            | Surfactin* <sup>3</sup>    | $CH_2 - 14.0$       | -  | 1035.7 | $1.9 \times 10^{-25}$ | 13 | <i>P. reactans</i>    | +  |
| 62                                                                            | Surfactin* <sup>4</sup>    | $CH_2 - 14.0$       | -  | 1021.7 | $8.5 \times 10^{-19}$ | 14 | <i>P. reactans</i>    | +  |
| 63                                                                            | Surfactin* <sup>5</sup>    | $CH_2 - 14.0$       | -  | 1021.7 | $7.9 \times 10^{-27}$ | 18 | <i>P. reactans</i>    | +  |
| 64                                                                            | Surfactin* <sup>6</sup>    | $CH_2 - 14.0$       | -  | 1035.7 | $8.4 \times 10^{-20}$ | 11 | <i>P. tolaasii</i>    | +  |
| PNP family: Xentrivalpeptides; Producer: <i>Xenorhabdus</i> [17]              |                            |                     |    |        |                       |    |                       |    |
| 65                                                                            | Xentrivalpep. Q            | $T - 90.0$          | D? | 670.4  | $1.9 \times 10^{-23}$ | 11 | <i>P. fluorescens</i> | -  |
| 66                                                                            | Xentrivalpep. A            | $T - 90.0$          | D? | 769.5  | $5.4 \times 10^{-20}$ | 15 | <i>P. tolaasii</i>    | -  |
| 67                                                                            | Xentrivalpep. B            | $V + 241.1$         | I? | 1024.6 | $3.9 \times 10^{-19}$ | 16 | <i>P. sp. C52</i>     | +  |
| 68                                                                            | Xentrivalpep. F            | $V + 171.0$         | I? | 1024.6 | $1.6 \times 10^{-24}$ | 16 | <i>P. putida</i>      | +  |
| 69                                                                            | Xentrivalpep. G            | $T - 70.0$          | D  | 769.5  | $2.9 \times 10^{-21}$ | 14 | <i>P. fluorescens</i> | -  |
| 70                                                                            | Xentrivalpep. G            | $V + 185.1$         | I? | 1024.6 | $8.9 \times 10^{-20}$ | 14 | N/A                   | +  |
| 71                                                                            | Xentrivalpep. K            | $Iva - 22.0$        | -  | 769.5  | $4.6 \times 10^{-18}$ | 12 | <i>P. fluorescens</i> | -  |
| PNP family: Bacillomycins and similar; Producer: <i>Bacillus</i> [18, 19]     |                            |                     |    |        |                       |    |                       |    |
| 72                                                                            | Bacillomycin F1            | $N - 27.0$          | -  | 1044.6 | $1.9 \times 10^{-20}$ | 17 | <i>P. reactans</i>    | +  |
| 73                                                                            | Bacillomycin F6            | $N - 27.0$          | -  | 1072.6 | $2.1 \times 10^{-23}$ | 14 | <i>P. rhodesiae</i>   | +  |
| 74                                                                            | Bacillopeptin B            | $S + 10.0$          | -  | 1044.6 | $1.3 \times 10^{-20}$ | 11 | <i>P. rhodesiae</i>   | +  |
| 75                                                                            | Bacillomycin* <sup>1</sup> | $E - 14.0$          | -  | 1044.5 | $3.9 \times 10^{-22}$ | 13 | <i>P. rhodesiae</i>   | +  |
| PNP family: SNA-60-367; Producer: <i>Bacillus</i> [20]                        |                            |                     |    |        |                       |    |                       |    |
| 76                                                                            | SNA-60-367* <sup>1</sup>   | $E + 30.0$          | -  | 1476.8 | $8.9 \times 10^{-31}$ | 22 | <i>P. rhodesiae</i>   | +  |
| 77                                                                            | SNA-60-367* <sup>2</sup>   | $E + 2.0$           | -  | 1476.8 | $1.1 \times 10^{-17}$ | 15 | <i>P. reactans</i>    | +  |
| 78                                                                            | SNA-60-367* <sup>3</sup>   | $E + 2.0$           | -  | 1490.8 | $9.3 \times 10^{-28}$ | 18 | <i>P. rhodesiae</i>   | +  |
| Singletons; Producers: NOT <i>Pseudomonas</i> , mostly marine sponges [21–36] |                            |                     |    |        |                       |    |                       |    |
| 79                                                                            | Antib. BK230               | $m.Y - 118.0$       | D? | 1007.7 | $2.3 \times 10^{-19}$ | 19 | <i>P. rhodesiae</i>   | +  |
| 80                                                                            | Axinastatin 4              | $L/I + 6.0$         | -  | 812.5  | $8.2 \times 10^{-22}$ | 10 | <i>P. fluorescens</i> | -  |
| 81                                                                            | $\alpha Subst. - I_B$      | $R - 156.1$         | D! | 529.3  | $3.0 \times 10^{-19}$ | 8  | <i>P. fluorescens</i> | +  |
| 82                                                                            | Callyaerin H               | $Dia + 80.0$        | I? | 1123.6 | $6.2 \times 10^{-21}$ | 16 | <i>P. fluorescens</i> | +  |
| 83                                                                            | Euryjanicin B              | $P + 48.0$          | -  | 757.4  | $3.7 \times 10^{-19}$ | 14 | <i>P. aeruginosa</i>  | -  |
| 84                                                                            | Gramicidin S2              | $Orn - 102.1$       | D  | 1024.6 | $1.1 \times 10^{-18}$ | 19 | <i>P. sp. Z</i>       | +  |

| #   | Peptide           | Offset               | M  | Mass   | P-value               | Sc | Strain                | SN |
|-----|-------------------|----------------------|----|--------|-----------------------|----|-----------------------|----|
| 85  | Hymenamamide F    | <i>R</i> - 138.1     | D? | 626.3  | $5.8 \times 10^{-18}$ | 12 | <i>P. fluorescens</i> | -  |
| 86  | Hymenamamide F    | <i>R</i> - 106.1     | D? | 658.3  | $2.6 \times 10^{-20}$ | 12 | <i>P. fluorescens</i> | -  |
| 87  | Hymenamamide F    | <i>R</i> - 7.0       | -  | 757.4  | $8.5 \times 10^{-25}$ | 14 | <i>P. ici</i>         | -  |
| 88  | Hymenamamide F    | <i>R</i> + 73.0      | I? | 837.4  | $4.6 \times 10^{-22}$ | 15 | <i>P. putida</i>      | -  |
| 89  | Hymenamamide H    | <i>P</i> - 91.1      | D? | 812.4  | $1.9 \times 10^{-21}$ | 13 | <i>P. sp. F</i>       | -  |
| 90  | Kulokainalide 1   | <i>Lac</i> + 233.1   | I? | 1123.6 | $1.1 \times 10^{-18}$ | 14 | N/A                   | +  |
| 91  | Lobocyclamide C   | <i>T</i> + 11.0      | -  | 1366.8 | $1.1 \times 10^{-19}$ | 18 | <i>P. putida</i>      | +  |
| 92  | Malaysiatin       | <i>V</i> - 85.1      | D? | 667.4  | $4.6 \times 10^{-18}$ | 9  | <i>P. fluorescens</i> | -  |
| 93  | Omphalotin F      | <i>m.L/I</i> - 103.0 | D  | 1294.8 | $5.1 \times 10^{-18}$ | 19 | <i>P. fluorescens</i> | +  |
| 94  | Phakellistatin 11 | <i>F</i> + 51.1      | -  | 1024.6 | $2.7 \times 10^{-18}$ | 16 | <i>P. putida</i>      | +  |
| 95  | Rolloamide A      | <i>L/I</i> - 112.1   | D? | 651.4  | $2.0 \times 10^{-19}$ | 14 | <i>P. sp. F</i>       | +  |
| 96  | Stylissamide B    | <i>P</i> - 22.0      | -  | 789.4  | $1.9 \times 10^{-18}$ | 11 | <i>P. putida</i>      | -  |
| 97  | V-L-P-V-P         | <i>V</i> - 99.1      | D! | 552.3  | $1.2 \times 10^{-20}$ | 8  | <i>P. rhodesiae</i>   | -  |
| 98  | Verrucamide B     | <i>m.F</i> - 7.0     | -  | 1393.8 | $1.1 \times 10^{-18}$ | 20 | <i>P. putida</i>      | +  |
| 99  | Wainunuamide      | <i>H</i> - 119.1     | D? | 626.3  | $2.7 \times 10^{-18}$ | 10 | <i>P. fluorescens</i> | -  |
| 100 | Wainunuamide      | <i>H</i> + 92.0      | I? | 837.4  | $2.8 \times 10^{-18}$ | 11 | <i>P. resinovor.</i>  | -  |

*Spectra*<sub>STREP1</sub>

PNP family: Surugamides and similar; Producer: Streptomyces [37-39]

|     |                     |                    |    |        |                       |    |                 |   |
|-----|---------------------|--------------------|----|--------|-----------------------|----|-----------------|---|
| 101 | Champacyclin        | <i>F</i> - 113.1   | D  | 784.5  | $2.8 \times 10^{-21}$ | 20 | <i>S. albus</i> | - |
| 102 | Champacyclin        | <i>L/I</i> - 99.9  | D  | 797.7  | $3.8 \times 10^{-19}$ | 12 | <i>S. albus</i> | - |
| 103 | Champacyclin        | <i>K</i> - 99.1    | D  | 798.5  | $1.7 \times 10^{-18}$ | 15 | <i>S. albus</i> | - |
| 104 | Champacyclin        | <i>F</i> - 95.1    | D? | 802.5  | $1.9 \times 10^{-20}$ | 20 | <i>S. albus</i> | - |
| 105 | Champacyclin        | <i>V</i> - 81.1    | D? | 816.6  | $2.7 \times 10^{-20}$ | 17 | <i>S. albus</i> | - |
| 106 | Champacyclin        | <i>V</i> - 71.1    | D  | 826.5  | $1.5 \times 10^{-19}$ | 17 | <i>S. albus</i> | - |
| 107 | Champacyclin        | <i>A</i> - 28.0    | -  | 869.6  | $2.1 \times 10^{-21}$ | 19 | <i>S. albus</i> | - |
| 108 | Champacyclin        | <i>L/I</i> - 14.1  | -  | 883.5  | $1.4 \times 10^{-24}$ | 16 | <i>S. albus</i> | - |
| 109 | Champacyclin        | <i>L/I</i> - 12.0  | -  | 885.6  | $3.9 \times 10^{-27}$ | 15 | <i>S. albus</i> | - |
| 110 | Champacyclin        | <i>F</i> + 4.0     | -  | 901.6  | $5.5 \times 10^{-20}$ | 16 | <i>S. albus</i> | - |
| 111 | Champacyclin        | <i>L/I</i> + 14.0  | -  | 911.6  | $3.7 \times 10^{-27}$ | 25 | <i>S. albus</i> | + |
| 112 | Champacyclin        | <i>V</i> + 15.1    | -  | 912.7  | $4.9 \times 10^{-19}$ | 15 | <i>S. albus</i> | - |
| 113 | Champacyclin        | <i>V</i> + 30.0    | -  | 927.6  | $8.3 \times 10^{-24}$ | 16 | <i>S. albus</i> | + |
| 114 | Champacyclin        | <i>V</i> + 36.0    | -  | 933.6  | $4.2 \times 10^{-23}$ | 21 | <i>S. albus</i> | - |
| 115 | Champacyclin        | <i>K</i> + 78.0    | I? | 975.6  | $1.2 \times 10^{-20}$ | 15 | <i>S. albus</i> | - |
| 116 | Champacyclin        | <i>K</i> + 128.0   | I  | 1025.6 | $1.1 \times 10^{-18}$ | 14 | <i>S. albus</i> | - |
| 117 | Surugamide A        | <i>L/I</i> - 113.1 | D! | 798.5  | $4.3 \times 10^{-21}$ | 18 | <i>S. albus</i> | + |
| 118 | Surugamide A        | <i>L/I</i> - 95.1  | D? | 816.5  | $2.0 \times 10^{-21}$ | 19 | <i>S. albus</i> | - |
| 119 | Surugamide A        | <i>L/I</i> - 95.1  | D? | 816.6  | $2.6 \times 10^{-22}$ | 14 | <i>S. albus</i> | - |
| 120 | Surugamide A        | <i>L/I</i> - 14.0  | -  | 897.6  | $6.4 \times 10^{-33}$ | 24 | N/A             | + |
| 121 | Surugamide A        | <i>L/I</i> + 14.0  | -  | 925.6  | $9.8 \times 10^{-21}$ | 23 | <i>S. albus</i> | - |
| 122 | Surugamide A        | <i>L/I</i> + 16.0  | -  | 927.6  | $1.2 \times 10^{-26}$ | 27 | <i>S. albus</i> | - |
| 123 | Surugamide A        | <i>L/I</i> + 18.0  | -  | 929.6  | $4.9 \times 10^{-22}$ | 20 | <i>S. albus</i> | - |
| 124 | Surugamide A        | <i>L/I</i> + 22.0  | -  | 933.6  | $8.7 \times 10^{-25}$ | 21 | <i>S. albus</i> | - |
| 125 | Surugamide A        | <i>L/I</i> + 28.0  | -  | 939.6  | $8.3 \times 10^{-26}$ | 18 | <i>S. albus</i> | - |
| 126 | Surugamide A        | <i>L/I</i> + 34.0  | -  | 945.6  | $1.9 \times 10^{-20}$ | 17 | <i>S. albus</i> | - |
| 127 | Surugamide A        | <i>K</i> + 42.0    | -  | 953.6  | $4.6 \times 10^{-23}$ | 19 | <i>S. albus</i> | - |
| 128 | Surugamide A        | <i>K</i> + 56.0    | I  | 967.7  | $1.7 \times 10^{-20}$ | 14 | <i>S. albus</i> | - |
| 129 | Surugamide A        | <i>K</i> + 72.0    | I  | 983.6  | $1.2 \times 10^{-20}$ | 17 | <i>S. albus</i> | - |
| 130 | Surugamide A        | <i>K</i> + 128.0   | I  | 1039.6 | $5.0 \times 10^{-24}$ | 21 | <i>S. albus</i> | - |
| 131 | Surugamide A        | <i>F</i> + 131.1   | I  | 1042.7 | $4.7 \times 10^{-20}$ | 20 | <i>S. albus</i> | - |
| 132 | Surugamide A        | <i>L/I</i> + 148.0 | I  | 1059.6 | $5.4 \times 10^{-25}$ | 20 | <i>S. albus</i> | - |
| 133 | Surugamide A        | <i>K</i> + 157.1   | I  | 1068.7 | $2.2 \times 10^{-22}$ | 21 | <i>S. albus</i> | - |
| 134 | Surugamide A        | <i>K</i> + 163.0   | I  | 1074.7 | $2.3 \times 10^{-19}$ | 14 | <i>S. albus</i> | - |
| 135 | Surugamide A        | <i>K</i> + 171.0   | I? | 1082.7 | $1.7 \times 10^{-22}$ | 18 | <i>S. albus</i> | - |
| 136 | Surugamide A        | <i>L/I</i> + 186.0 | I  | 1097.7 | $2.5 \times 10^{-20}$ | 16 | <i>S. albus</i> | - |
| 137 | Surugamide A        | <i>L/I</i> + 197.1 | I? | 1108.7 | $4.0 \times 10^{-22}$ | 16 | <i>S. albus</i> | - |
| 138 | Surugamide A        | <i>L/I</i> + 251.1 | I? | 1162.7 | $2.1 \times 10^{-20}$ | 15 | <i>S. albus</i> | - |
| 139 | <b>Surugamide B</b> | <i>K</i> - 128.1   | D! | 769.5  | $1.7 \times 10^{-19}$ | 20 | <i>S. albus</i> | - |
| 140 | Surugamide B        | <i>K</i> - 85.0    | D? | 812.6  | $4.2 \times 10^{-25}$ | 21 | <i>S. albus</i> | - |
| 141 | Surugamide B        | <i>F</i> - 34.0    | -  | 863.6  | $9.7 \times 10^{-21}$ | 24 | <i>S. albus</i> | + |
| 142 | Surugamide B        | <i>L/I</i> - 28.0  | -  | 869.6  | $5.3 \times 10^{-21}$ | 19 | <i>S. albus</i> | + |
| 143 | Surugamide B        | <i>L/I</i> - 14.0  | -  | 883.6  | $5.0 \times 10^{-26}$ | 22 | <i>S. albus</i> | + |
| 144 | Surugamide B        | <i>L/I</i> - 12.0  | -  | 885.6  | $1.4 \times 10^{-21}$ | 16 | <i>S. albus</i> | - |
| 145 | Surugamide B        | <i>K</i> + 14.0    | -  | 911.6  | $4.8 \times 10^{-23}$ | 21 | <i>S. albus</i> | + |
| 146 | Surugamide B        | <i>L/I</i> + 16.0  | -  | 913.6  | $2.6 \times 10^{-24}$ | 19 | <i>S. albus</i> | + |

| #                                                                                               | Peptide          | Offset             | M  | Mass   | <i>P</i> -value       | Sc | Strain                 | SN |
|-------------------------------------------------------------------------------------------------|------------------|--------------------|----|--------|-----------------------|----|------------------------|----|
| 147                                                                                             | Surugamide B     | <i>F</i> + 18.0    | -  | 915.6  | $4.5 \times 10^{-23}$ | 15 | <i>S. albus</i>        | +  |
| 148                                                                                             | Surugamide B     | <i>K</i> + 22.0    | -  | 919.6  | $4.0 \times 10^{-21}$ | 22 | <i>S. albus</i>        | -  |
| 149                                                                                             | Surugamide B     | <i>K</i> + 28.0    | -  | 925.6  | $2.5 \times 10^{-25}$ | 26 | <i>S. albus</i>        | +  |
| 150                                                                                             | Surugamide B     | <i>L/I</i> + 34.0  | -  | 931.6  | $2.8 \times 10^{-21}$ | 17 | <i>S. albus</i>        | -  |
| 151                                                                                             | Surugamide B     | <i>K</i> + 42.0    | -  | 939.6  | $3.1 \times 10^{-20}$ | 15 | <i>S. albus</i>        | -  |
| 152                                                                                             | Surugamide B     | <i>K</i> + 58.0    | I  | 955.6  | $2.8 \times 10^{-19}$ | 17 | <i>S. albus</i>        | -  |
| 153                                                                                             | Surugamide B     | <i>K</i> + 70.0    | I? | 967.6  | $3.0 \times 10^{-27}$ | 27 | <i>S. albus</i>        | -  |
| 154                                                                                             | Surugamide B     | <i>K</i> + 72.0    | I  | 969.6  | $2.7 \times 10^{-22}$ | 19 | <i>S. albus</i>        | -  |
| 155                                                                                             | Surugamide B     | <i>K</i> + 100.0   | I  | 997.6  | $2.8 \times 10^{-21}$ | 14 | <i>S. albus</i>        | -  |
| 156                                                                                             | Surugamide B     | <i>K</i> + 148.0   | I  | 1045.6 | $2.0 \times 10^{-25}$ | 17 | <i>S. albus</i>        | -  |
| 157                                                                                             | Surugamide B     | <i>K</i> + 169.1   | I? | 1066.7 | $6.5 \times 10^{-21}$ | 23 | <i>S. albus</i>        | -  |
| 158                                                                                             | Surugamide B     | <i>K</i> + 177.0   | I? | 1074.6 | $3.9 \times 10^{-21}$ | 27 | <i>S. albus</i>        | -  |
| 159                                                                                             | Surugamide C     | <i>K</i> - 99.1    | D  | 798.5  | $1.6 \times 10^{-19}$ | 18 | <i>S. albus</i>        | +  |
| 160                                                                                             | Surugamide C     | <i>V</i> - 81.1    | D? | 816.5  | $7.3 \times 10^{-22}$ | 19 | <i>S. albus</i>        | -  |
| 161                                                                                             | Surugamide C     | <i>L/I</i> - 42.0  | -  | 855.6  | $5.9 \times 10^{-23}$ | 16 | <i>S. albus</i>        | -  |
| 162                                                                                             | Surugamide C     | <i>L/I</i> - 28.0  | -  | 869.6  | $6.7 \times 10^{-27}$ | 31 | <i>S. albus</i>        | -  |
| 163                                                                                             | Surugamide C     | <i>L/I</i> - 14.0  | -  | 883.6  | $1.8 \times 10^{-27}$ | 23 | <i>S. albus</i>        | +  |
| 164                                                                                             | Surugamide C     | <i>L/I</i> + 16.0  | -  | 913.6  | $4.3 \times 10^{-19}$ | 13 | <i>S. albus</i>        | +  |
| 165                                                                                             | Surugamide C     | <i>K</i> + 28.0    | -  | 925.6  | $3.5 \times 10^{-21}$ | 21 | <i>S. albus</i>        | +  |
| 166                                                                                             | Surugamide C     | <i>K</i> + 42.0    | -  | 939.6  | $1.8 \times 10^{-19}$ | 17 | <i>S. albus</i>        | +  |
| 167                                                                                             | Surugamide C     | <i>L/I</i> + 72.0  | I  | 969.6  | $2.1 \times 10^{-19}$ | 13 | <i>S. albus</i>        | -  |
| 168                                                                                             | Surugamide C     | <i>L/I</i> + 146.1 | I? | 1043.7 | $9.2 \times 10^{-19}$ | 13 | <i>S. albus</i>        | -  |
| 169                                                                                             | Surugamide C     | <i>K</i> + 180.0   | I? | 1077.6 | $5.2 \times 10^{-21}$ | 14 | <i>S. albus</i>        | -  |
| 170                                                                                             | Surugamide D     | <i>F</i> - 113.1   | D  | 784.5  | $7.2 \times 10^{-19}$ | 15 | <i>S. albus</i>        | -  |
| 171                                                                                             | Surugamide D     | <i>L/I</i> - 110.1 | D? | 787.5  | $4.8 \times 10^{-20}$ | 14 | <i>S. albus</i>        | -  |
| 172                                                                                             | Surugamide D     | <i>L/I</i> - 99.1  | D  | 798.5  | $1.3 \times 10^{-22}$ | 22 | <i>S. albus</i>        | -  |
| 173                                                                                             | Surugamide D     | <i>F</i> - 95.1    | D? | 802.5  | $3.9 \times 10^{-22}$ | 22 | <i>S. albus</i>        | -  |
| 174                                                                                             | Surugamide D     | <i>L/I</i> - 94.1  | D? | 803.5  | $1.9 \times 10^{-23}$ | 21 | <i>S. albus</i>        | -  |
| 175                                                                                             | Surugamide D     | <i>F</i> - 34.0    | -  | 863.6  | $1.6 \times 10^{-19}$ | 23 | <i>S. albus</i>        | +  |
| 176                                                                                             | Surugamide D     | <i>L/I</i> - 28.0  | -  | 869.6  | $5.4 \times 10^{-26}$ | 24 | <i>S. albus</i>        | -  |
| 177                                                                                             | Surugamide D     | <i>L/I</i> - 14.0  | -  | 883.6  | $7.6 \times 10^{-27}$ | 26 | <i>S. albus</i>        | +  |
| 178                                                                                             | Surugamide D     | <i>L/I</i> + 8.0   | -  | 905.6  | $2.5 \times 10^{-19}$ | 19 | <i>S. albus</i>        | -  |
| 179                                                                                             | Surugamide D     | <i>K</i> + 14.0    | -  | 911.6  | $9.2 \times 10^{-27}$ | 31 | <i>S. albus</i>        | +  |
| 180                                                                                             | Surugamide D     | <i>F</i> + 16.0    | -  | 913.6  | $1.5 \times 10^{-23}$ | 18 | <i>S. albus</i>        | +  |
| 181                                                                                             | Surugamide D     | <i>K</i> + 18.0    | -  | 915.6  | $3.3 \times 10^{-22}$ | 18 | <i>S. albus</i>        | +  |
| 182                                                                                             | Surugamide D     | <i>K</i> + 22.0    | -  | 919.6  | $5.6 \times 10^{-22}$ | 24 | <i>S. albus</i>        | -  |
| 183                                                                                             | Surugamide D     | <i>L/I</i> + 28.0  | -  | 925.6  | $5.9 \times 10^{-21}$ | 17 | <i>S. albus</i>        | -  |
| 184                                                                                             | Surugamide D     | <i>L/I</i> + 34.0  | -  | 931.6  | $6.1 \times 10^{-20}$ | 13 | <i>S. albus</i>        | -  |
| 185                                                                                             | Surugamide D     | <i>K</i> + 70.0    | I? | 967.6  | $4.7 \times 10^{-19}$ | 16 | <i>S. albus</i>        | -  |
| 186                                                                                             | Surugamide D     | <i>K</i> + 100.0   | I  | 997.6  | $1.5 \times 10^{-21}$ | 14 | <i>S. albus</i>        | -  |
| 187                                                                                             | Surugamide D     | <i>L/I</i> + 116.1 | I? | 1013.7 | $2.8 \times 10^{-27}$ | 15 | <i>S. albus</i>        | -  |
| 188                                                                                             | Surugamide D     | <i>L/I</i> + 148.0 | I  | 1045.6 | $3.2 \times 10^{-21}$ | 16 | <i>S. albus</i>        | -  |
| 189                                                                                             | Surugamide D     | <i>K</i> + 149.0   | I? | 1046.6 | $2.1 \times 10^{-25}$ | 30 | <i>S. albus</i>        | -  |
| PNP family: Phepropeptins and similar; Producers: <i>Streptomyces</i> [40], <i>Euryyon</i> [33] |                  |                    |    |        |                       |    |                        |    |
| 190                                                                                             | Phepropeptin A   | <i>L/I</i> - 95.1  | D? | 587.4  | $1.5 \times 10^{-19}$ | 16 | <i>S. albus</i>        | -  |
| 191                                                                                             | Rolloamide A     | <i>F</i> - 113.0   | D  | 650.4  | $1.4 \times 10^{-18}$ | 12 | <i>S. e14</i>          | -  |
| Singletons; Producers: <i>Streptomyces</i> [41-43]                                              |                  |                    |    |        |                       |    |                        |    |
| 192                                                                                             | Desotamide       | <i>G</i> + 32.0    | -  | 542.3  | $1.0 \times 10^{-19}$ | 12 | N/A                    | -  |
| 193                                                                                             | Stenothricin     | <i>A</i> + 18.0    | -  | 1149.6 | $8.4 \times 10^{-23}$ | 16 | <i>S. roseosporus</i>  | -  |
| 194                                                                                             | Virginiamycin S1 | <i>m.F</i> - 78.0  | D? | 745.3  | $4.5 \times 10^{-19}$ | 11 | <i>S. pristinaesp.</i> | -  |
| PNP family: Isariins; Producer: fungus <i>Isaria</i> [44, 45]                                   |                  |                    |    |        |                       |    |                        |    |
| 195                                                                                             | Isariin A        | <i>V</i> + 179.1   | I? | 816.6  | $8.3 \times 10^{-20}$ | 16 | <i>S. albus</i>        | -  |
| 196                                                                                             | Isoisariin B     | <i>G</i> + 207.1   | I? | 802.5  | $1.9 \times 10^{-18}$ | 15 | <i>S. albus</i>        | -  |
| Singletons; Producers: NOT <i>Streptomyces</i> [46-49]                                          |                  |                    |    |        |                       |    |                        |    |
| 197                                                                                             | Aurilide B       | <i>lt</i> + 54.0   | -  | 887.6  | $1.1 \times 10^{-18}$ | 12 | <i>S. albus</i>        | -  |
| 198                                                                                             | Barangamide B    | <i>L/I</i> + 193.0 | I? | 1270.7 | $5.8 \times 10^{-24}$ | 26 | <i>S. sviveus</i>      | -  |
| 199                                                                                             | KMM1364C         | <i>L/I</i> - 14.0  | -  | 1035.7 | $2.1 \times 10^{-18}$ | 11 | <i>S. lividans</i>     | +  |
| 200                                                                                             | Unguisin D       | <i>W</i> - 101.0   | D  | 637.5  | $1.6 \times 10^{-21}$ | 20 | <i>S. albus</i>        | +  |
| <i>Spectra</i> <sub>STREP<sub>2</sub></sub>                                                     |                  |                    |    |        |                       |    |                        |    |
| PNP family: Surugamides and similar; Producer: <i>Streptomyces</i> [37-39]                      |                  |                    |    |        |                       |    |                        |    |
| 201                                                                                             | Champacyclin     | <i>V</i> + 14.0    | -  | 911.6  | $1.2 \times 10^{-19}$ | 20 | <i>S. CNQ329</i>       | +  |
| 202                                                                                             | Champacyclin     | <i>F</i> + 139.1   | I? | 1036.7 | $2.5 \times 10^{-12}$ | 13 | <i>S. hygroscep.</i>   | -  |
| 203                                                                                             | Surugamide A     | <i>L/I</i> - 14.0  | -  | 897.6  | $2.5 \times 10^{-16}$ | 15 | <i>S. CNQ329</i>       | +  |

| #                                                                            | Peptide                        | Offset              | M  | Mass   | P-value               | Sc | Strain                 | SN |
|------------------------------------------------------------------------------|--------------------------------|---------------------|----|--------|-----------------------|----|------------------------|----|
| 204                                                                          | Surugamide A                   | <i>F</i> + 18.0     | -  | 929.6  | $3.4 \times 10^{-13}$ | 13 | <i>S. CNQ329</i>       | +  |
| 205                                                                          | Surugamide A                   | <i>L/I</i> + 20.0   | -  | 929.6  | $4.9 \times 10^{-13}$ | 11 | <i>S. CNQ329</i>       | +  |
| 206                                                                          | Surugamide A                   | <i>K</i> + 22.0     | -  | 933.6  | $7.8 \times 10^{-16}$ | 14 | <i>S. albus</i>        | -  |
| 207                                                                          | Surugamide A                   | <i>K</i> + 42.0     | -  | 953.6  | $4.3 \times 10^{-19}$ | 14 | <i>S. CNQ329</i>       | -  |
| 208                                                                          | Surugamide B                   | <i>A</i> - 14.0     | -  | 883.6  | $1.9 \times 10^{-16}$ | 14 | <i>S. albus</i>        | -  |
| 209                                                                          | Surugamide B                   | <i>L/I</i> + 14.0   | -  | 911.6  | $1.1 \times 10^{-19}$ | 14 | <i>S. CNT302</i>       | +  |
| 210                                                                          | Surugamide B                   | <i>F</i> + 18.0     | -  | 915.6  | $2.2 \times 10^{-12}$ | 11 | <i>S. albus</i>        | -  |
| 211                                                                          | Surugamide B                   | <i>L/I</i> + 36.0   | -  | 933.6  | $3.6 \times 10^{-15}$ | 14 | <i>S. CNQ329</i>       | -  |
| 212                                                                          | Surugamide B                   | <i>K</i> + 56.0     | I  | 953.6  | $3.9 \times 10^{-15}$ | 13 | <i>S. albus</i>        | -  |
| 213                                                                          | Surugamide C                   | <i>L/I</i> + 14.0   | -  | 911.6  | $9.3 \times 10^{-21}$ | 16 | <i>S. CNY228</i>       | +  |
| 214                                                                          | Surugamide C                   | <i>L/I</i> + 56.0   | -  | 953.6  | $5.6 \times 10^{-16}$ | 18 | <i>S. CNQ329</i>       | -  |
| 215                                                                          | Surugamide D                   | <i>L/I</i> + 14.0   | -  | 911.6  | $1.3 \times 10^{-16}$ | 16 | <i>S. albus</i>        | +  |
| PNP family: Calcium-Dependent Antibiotics (CDA); Producer: Streptomyces [50] |                                |                     |    |        |                       |    |                        |    |
| 216                                                                          | CDA* <sup>1</sup>              | <i>G</i> + 14.0     | -  | 1494.5 | $6.2 \times 10^{-16}$ | 18 | <i>S. coelicolor</i>   | +  |
| 217                                                                          | CDA* <sup>1</sup>              | <i>ns1</i> + 36.0   | -  | 1516.5 | $2.3 \times 10^{-12}$ | 13 | <i>S. coelicolor</i>   | -  |
| 218                                                                          | CDA 4a                         | <i>T</i> + 42.0     | -  | 1494.5 | $1.8 \times 10^{-14}$ | 16 | <i>S. coelicolor</i>   | +  |
| Singletons; Producers: Streptomyces [51–57]                                  |                                |                     |    |        |                       |    |                        |    |
| 219                                                                          | Actinomycin G3                 | <i>Achr</i> - 168.0 | D? | 1104.6 | $2.5 \times 10^{-12}$ | 12 | <i>S. TAA040</i>       | -  |
| 220                                                                          | Glycinocin D                   | <i>P</i> + 44.0     | -  | 1276.6 | $1.0 \times 10^{-11}$ | 14 | <i>S. CNX435</i>       | -  |
| 221                                                                          | Grisemycin                     | <i>A</i> + 16.0     | -  | 1848.0 | $3.2 \times 10^{-30}$ | 17 | <i>S. griseus</i>      | -  |
| 222                                                                          | Grisemycin                     | <i>Q</i> + 22.0     | -  | 1854.0 | $5.2 \times 10^{-29}$ | 19 | <i>S. griseus</i>      | -  |
| 223                                                                          | Nocardamine                    | <i>Suc</i> - 40.0   | -  | 544.4  | $7.2 \times 10^{-13}$ | 8  | <i>S. griseoflavus</i> | -  |
| 224                                                                          | Nocardamine                    | <i>Suc</i> + 18.0   | -  | 602.4  | $2.3 \times 10^{-12}$ | 8  | <i>S. CNT318</i>       | -  |
| 225                                                                          | Streptofactin                  | <i>K</i> + 126.1    | I? | 953.6  | $5.0 \times 10^{-17}$ | 10 | <i>S. albus</i>        | +  |
| 226                                                                          | Veneptide                      | <i>L/I</i> + 15.0   | -  | 2138.1 | $3.3 \times 10^{-13}$ | 10 | <i>S. lividans</i>     | -  |
| 227                                                                          | <b>Veneptide</b>               | <i>N</i> + 31.0     | -  | 2154.1 | $3.2 \times 10^{-15}$ | 13 | <i>S. lividans</i>     | -  |
| 228                                                                          | WS9326C                        | <i>ns2</i> + 14.0   | -  | 1036.5 | $1.8 \times 10^{-12}$ | 9  | <i>S. griseoflavus</i> | +  |
| PNP family: Surfactins and similar; Producer: Bacillus [14–16]               |                                |                     |    |        |                       |    |                        |    |
| 229                                                                          | Esperin                        | <i>E</i> - 14.0     | -  | 1021.7 | $3.2 \times 10^{-13}$ | 8  | N/A                    | +  |
| 230                                                                          | Surfactin* <sup>1</sup>        | <i>L/I</i> + 30.0   | -  | 1065.7 | $2.6 \times 10^{-12}$ | 13 | <i>S. CNS580</i>       | -  |
| 231                                                                          | Surfactin D                    | <i>V</i> + 14.0     | -  | 1063.7 | $8.0 \times 10^{-12}$ | 9  | N/A                    | +  |
| 232                                                                          | Surfactin* <sup>6</sup>        | <i>L/I</i> + 14.0   | -  | 1063.7 | $6.0 \times 10^{-14}$ | 10 | N/A                    | +  |
| Singletons; Producers: NOT Streptomyces [21, 58–66]                          |                                |                     |    |        |                       |    |                        |    |
| 233                                                                          | Clavariopsis B                 | <i>G</i> - 7.0      | -  | 1132.7 | $1.3 \times 10^{-12}$ | 13 | <i>S. CNQ865</i>       | -  |
| 234                                                                          | Keenamamide A                  | <i>Thz</i> - 62.0   | D? | 556.3  | $8.5 \times 10^{-12}$ | 8  | <i>S. coelicolor</i>   | -  |
| 235                                                                          | Lariat A                       | <i>S</i> + 88.1     | I? | 2138.1 | $2.1 \times 10^{-12}$ | 12 | <i>S. coelicolor</i>   | -  |
| 236                                                                          | Myxochromide A1                | <i>Q</i> - 65.1     | D? | 754.4  | $8.2 \times 10^{-12}$ | 7  | <i>S. CNS654</i>       | -  |
| 237                                                                          | Nostopeptolide A* <sup>1</sup> | <i>But</i> + 12.0   | -  | 1092.6 | $8.9 \times 10^{-14}$ | 12 | <i>S. CNQ329</i>       | -  |
| 238                                                                          | Petriellin A                   | <i>A</i> - 10.0     | -  | 1420.9 | $2.3 \times 10^{-13}$ | 17 | <i>S. CNQ865</i>       | -  |
| 239                                                                          | Pleofungin C                   | <i>m.L/I</i> - 28.0 | -  | 1052.7 | $9.7 \times 10^{-12}$ | 13 | <i>S. hygrosco.</i>    | -  |
| 240                                                                          | Pyoverdin Pf1547               | <i>A</i> - 30.0     | -  | 1517.7 | $4.5 \times 10^{-14}$ | 10 | <i>S. griseus</i>      | -  |
| 241                                                                          | Sch 378167* <sup>1</sup>       | <i>Leuc</i> - 114.0 | D! | 1021.6 | $8.4 \times 10^{-12}$ | 14 | <i>S. CNS580</i>       | -  |
| 242                                                                          | Sch 378167* <sup>1</sup>       | <i>F</i> - 50.0     | -  | 1085.7 | $9.6 \times 10^{-13}$ | 14 | <i>S. CNS580</i>       | -  |
| 243                                                                          | Taxillaid                      | <i>L/I</i> + 146.1  | I  | 953.6  | $1.0 \times 10^{-14}$ | 12 | <i>S. albus</i>        | +  |



**Supplementary Table 16.** Iterative VarQuest run on the *Spectra<sub>CYANO</sub>* dataset. *First iteration* is the run of VarQuest on the entire *Spectra<sub>CYANO</sub>* dataset against *PNPdatabase* (5021 PNPs). *Second iteration* is the run of VarQuest on the *Spectra<sub>CYANO</sub>* dataset without already identified spectra against the most reliable PNP variants (target and decoy) identified on the first iteration (*FirstIterationDB* with 81 PNP variants). All PSMs with  $P$ -values above  $10^{-10}$  were removed beforehand. # PSMs and # variants stand for the number of identified PSMs and PNP variants, respectively. # PNPs (best) stands for the number of unique PNP identifications in target and decoy databases independently (together, i.e. if a PNP was identified in both target and decoy databases, only the best identification is counted). Target and Decoy stand for identifications in the target PNP database (*PNPdatabase* or *FirstIterationDB*) and its decoy version, respectively. Decoy' is for the second iteration identifications in *FirstIterationDB* matching with PNPs originated from decoy PNP variants of the first iteration. FDR stands for the False Discovery Rate, the ratio of the total number of decoy hits to the number of target hits.

|         | First iteration |            |               | Second iteration |            |               |
|---------|-----------------|------------|---------------|------------------|------------|---------------|
|         | # PSMs          | # variants | # PNPs (best) | # PSMs           | # variants | # PNPs (best) |
| Target  | 3573            | 2083       | 702 (688)     | 626              | 353        | 41 (41)       |
| Decoy   | 101             | 95         | 84 (40)       | 5                | 5          | 5 (0)         |
| Decoy'  | -               | -          | -             | 2                | 2          | 1 (1)         |
| FDR (%) | 2.8             | 4.6        | 12.0 (5.8)    | 1.1              | 2.0        | 14.6 (2.4)    |

**Supplementary Table 17.** List of common mass offsets identified by VarQuest in *Spectra<sub>CYANO</sub>* at the 2nd iterative run. Only offsets identified in at least 5 PNP variants are shown. The total offset range  $-300 \dots 300$  Da was divided into non-overlapping intervals of size 0.1 Da. All PNP variants (385) were grouped according to the second iteration offset. The groups were sorted by the size. Offset is the mass difference between a PNP from *FirstIterationDB* and its identified variant (in Da). Possible explanation is a name of common modification/mutation matching the mass offset (if known). # PNP variants stands for the number of PNP variants identified with specified mass offset.

| Offset     | Possible explanation | # PNP variants |
|------------|----------------------|----------------|
| $\pm 14.0$ | methylation          | 17             |
| $\pm 32.0$ | dioxidation          | 10             |
| $\pm 18.0$ | hydration            | 10             |
| $\pm 38.0$ | acrolein [67]        | 6              |
| $\pm 6.0$  | —                    | 5              |
| $\pm 16.0$ | hydroxylation        | 5              |
| $\pm 26.0$ | —                    | 5              |
| $\pm 28.0$ | dimethylation        | 5              |
| $\pm 40.0$ | —                    | 5              |
| $\pm 44.0$ | —                    | 5              |

**Supplementary Table 18.** Abbreviations of PNPs with complex names in the PNPdatabase. *Abbreviation* is a short name used in Supplementary Table 15. *Full name* stands for the full name present in the PNPdatabase. *Mass* is PNP monoisotopic mass (in Da). *Origin* is original database of the compound (AntiMarin [3], DNP [2], MIBiG [4], or StreptomeDB [5]).

| Abbreviation                   | Full name                                            | Mass   | Origin    |
|--------------------------------|------------------------------------------------------|--------|-----------|
| Bacillomycin* <sup>1</sup>     | Bacillomycin D methyl ester                          | 1058.6 | AntiMarin |
| CDA* <sup>1</sup>              | Antibiotic CDA 2.1,3.1-Didehydro(Z-)                 | 1480.5 | DNP       |
| Massetolide* <sup>1</sup>      | Massetolides Diastereoisomer                         | 1167.7 | DNP       |
| Nostopeptolide A* <sup>1</sup> | Nostopeptolide A 4-Epimer                            | 1080.6 | DNP       |
| Orfamide A* <sup>1</sup>       | Orfamide A 7-Valine analogue                         | 1280.8 | DNP       |
| Putisolvin I* <sup>1</sup>     | Putisolvin I 2-Isoleucine or Leucine analogue        | 1393.8 | DNP       |
| SNA 60-367* <sup>1</sup>       | SNA 60-367 2-Deoxy 1                                 | 1446.8 | DNP       |
| SNA 60-367* <sup>2</sup>       | SNA 60-367 2-Deoxy 2                                 | 1474.8 | DNP       |
| SNA 60-367* <sup>3</sup>       | SNA 60-367 2-Deoxy 3                                 | 1488.8 | DNP       |
| Sch 378167* <sup>1</sup>       | Sch 378167 5,5-Diamide                               | 1135.7 | DNP       |
| Surfactin* <sup>1</sup>        | Surfactin 1-Me ester 1                               | 1035.7 | DNP       |
| Surfactin* <sup>2</sup>        | Surfactin 1-Me ester 2                               | 1049.7 | DNP       |
| Surfactin* <sup>3</sup>        | (Ile2,Ile7)-Surfactin C15 monomethyl est             | 1049.7 | AntiMarin |
| Surfactin* <sup>4</sup>        | (Ile7)-Surfactin C13ai dimethyl ester                | 1035.7 | AntiMarin |
| Surfactin* <sup>5</sup>        | (Ile7)-Surfactin C14 monomethyl ester                | 1035.7 | AntiMarin |
| Surfactin* <sup>6</sup>        | (Ile7)-Surfactin C14i dimethyl ester                 | 1049.7 | AntiMarin |
| Tolaasin* <sup>1</sup>         | Tolaasin Ring-opened form                            | 2004.2 | DNP       |
| Xantholysin A* <sup>1</sup>    | Xantholysin A 14-Valine analogue                     | 1761.1 | DNP       |
| Xantholysin A* <sup>2</sup>    | Xantholysin A N1-Deacyl, N1-(3-hydroxy-5-dodecenoyl) | 1801.1 | DNP       |

**Supplementary Table 19.** Abbreviations of non-standard amino acids (residues) in PNPs in the PNPdatabase. *Abbreviation* is a short name used in Supplementary Table 4 and S15. *Full name* stands for the proposed full name of the residue (note: the same chemical formula can represent different residues but mass-spectrometry and VarQuest are blind to residue stereochemistry). *Formula* is for chemical formula. *Mass* is monoisotopic mass (in Da).

| Abbreviation | Full name                  | Formula              | Mass  |
|--------------|----------------------------|----------------------|-------|
| Achr         | Actinoyl chromophore       | $C_{16}H_{10}O_5N_2$ | 310.1 |
| But          | Butyrate                   | $C_4H_6O$            | 86.0  |
| Cap          | Capreomycinidine           | $C_6H_{10}ON_4$      | 154.1 |
| Dia          | Diaminoacrylic acid        | $C_8H_{12}O_3N_2$    | 184.1 |
| Hiv          | Hydroxyisovaleric acid     | $C_5H_8O_2$          | 100.1 |
| Iva          | Isovalerate                | $C_5H_8O$            | 84.1  |
| Lac          | Lactic Acid                | $C_3H_6O_3$          | 90.0  |
| Leuc         | Leucic acid                | $C_6H_{10}O_2$       | 114.1 |
| NMA          | N-methylol acrylamide      | $C_4H_5ON$           | 131.0 |
| Orn          | Ornithine                  | $C_5H_{10}ON_2$      | 114.1 |
| Suc          | Succinyl amide             | $C_9H_{16}O_3N_2$    | 200.1 |
| Thz          | Thiazole-4-carboxylic acid | $C_4HONS$            | 111.0 |
| $\Delta$ But | Dehydroaminobutyric acid   | $C_4H_5ON$           | 83.0  |
| ns1          | non-standard 1             | $C_8H_7O_2N$         | 149.0 |
| ns2          | non-standard 2             | $C_{14}H_{14}O$      | 198.1 |

## Supplementary Figures

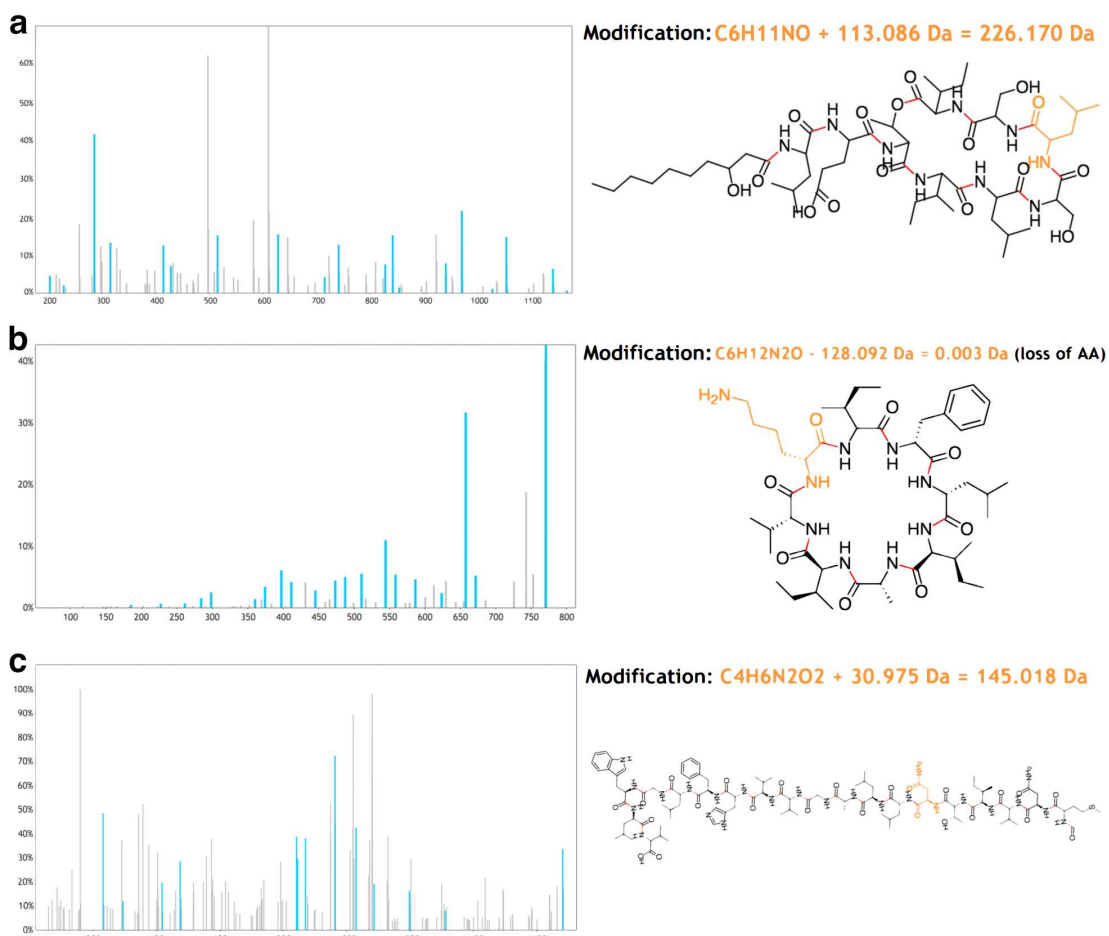

**Supplementary Figure 1. Fragments of VarQuest interactive visualization of PSMs for Massetolide-1252 (a), Surugamide-769 (b), and Venepetide-2154 (c).** Tandem mass spectra are shown on the left (matched peaks are highlighted) and known PNP structures are shown on the right, peptide bonds are colored red. Predicted modifications are colored orange and information on the mass offsets and the modified amino acid are given above the chemical structures. User may select any matched peak to see the corresponding fragmentation of the chemical structure. Interactive visualizations are available at <http://cab.spbu.ru/software/varquest>.

2863086-2868922

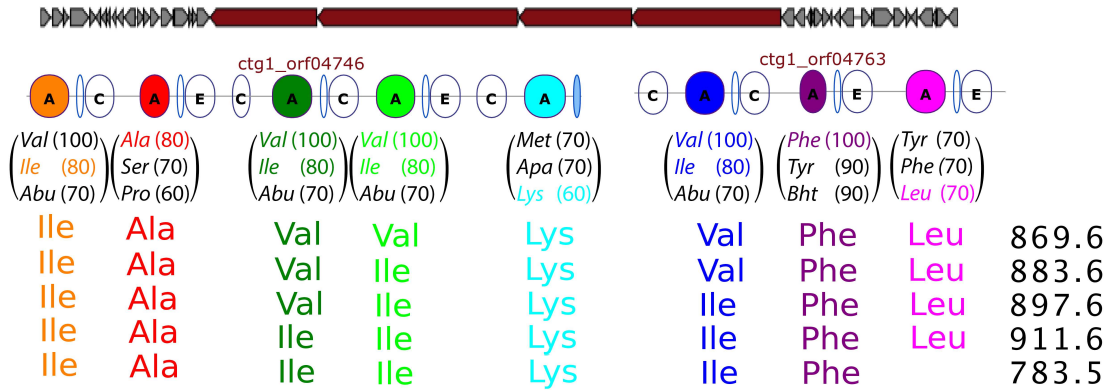

**Supplementary Figure 2. The proposed surugamide biosynthetic gene cluster and various surugamides (along with their masses in Da) explained by it.** The first five PNPs were reported in [39], the last one is Surugamide-769 found by VarQuest as a modification of surugamide B (mass is 897.6 Da). The ORFs 4751 (4 adenylation domains) and 4755 (6 adenylation domains), separating ORFs 4748 and 4759 are not shown. Three most likely amino acids for each adenylation domain are shown along with their NRPS2predictor [68] scores. The residues in these NRPs correlate with the residues predicted by NRPS2predictor (shown by the same colors). The biosynthetic gene cluster was identified by antiSMASH [69]. Although the previous studies of spectral networks [70–72] demonstrated that each connected component usually corresponds to related peptides (e.g., to a PNP family), the opposite statement is not necessarily true, i.e., related peptides sometimes form multiple connected components. E.g., the SpecNets approach missed Surugamide-769 because its connected component does not contain known surugamides.

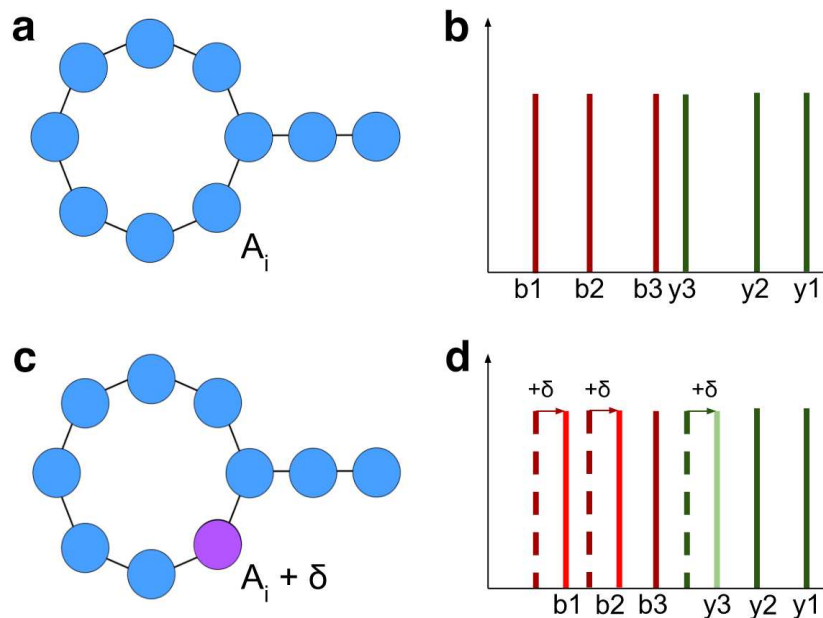

**Supplementary Figure 3. Correspondence between theoretical spectra of a PNP and its variant.** A PNP  $P$  (a) along with its theoretical spectrum (b) and a variant of  $P$  with a modification  $\delta$  on one of its amino acids (c) along with its theoretical spectrum (d). Complementary peaks are arbitrarily labeled as  $b$ - and  $y$ - peaks with the same indexes. Corresponding peaks in both spectra have identical labels. For simplicity, only 6 peaks are shown.

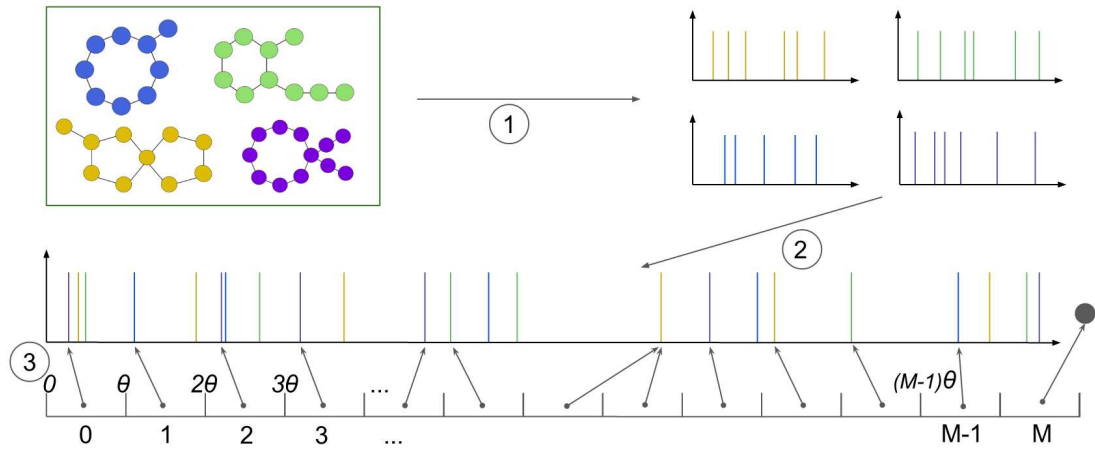

**Supplementary Figure 4. Preprocessing a given PNP database  $Peptides$ .** Stage 1: generating theoretical spectra for each peptide in the database. Stage 2: combining and sorting peaks from each spectrum altogether to create a list of sorted theoretical peaks  $SortedPeaks(Peptides)$ . Each peak is associated with the related peptide (shown by color). Stage 3: indexing the list of peaks to create an indexing table  $Index(Peptides, M, \theta)$ . The  $i$ -th cell contains a pointer to the minimal peak larger than or equal to  $i\theta$ .

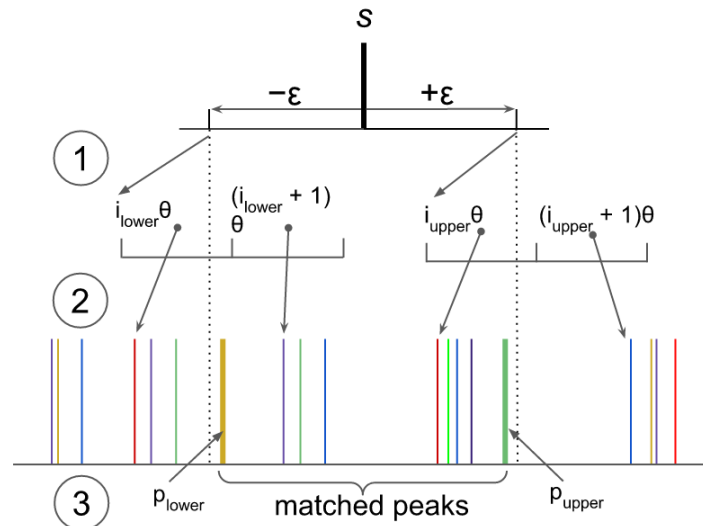

**Supplementary Figure 5. Scoring an experimental peak  $s$ .** Theoretical peak  $p$  matches  $s$  if  $s - \epsilon < p < s + \epsilon$ . We refer to the smallest (largest) matched peak as  $p_{lower}$  ( $p_{upper}$ ). Stage 1: determine indexes of the intervals containing  $p_{lower}$  and  $p_{upper}$ . Stage 2: use binary search to find exact values of  $p_{lower}$  and  $p_{upper}$ . Stage 3: iterate from  $p_{lower}$  to  $p_{upper}$  to find all matching peaks.

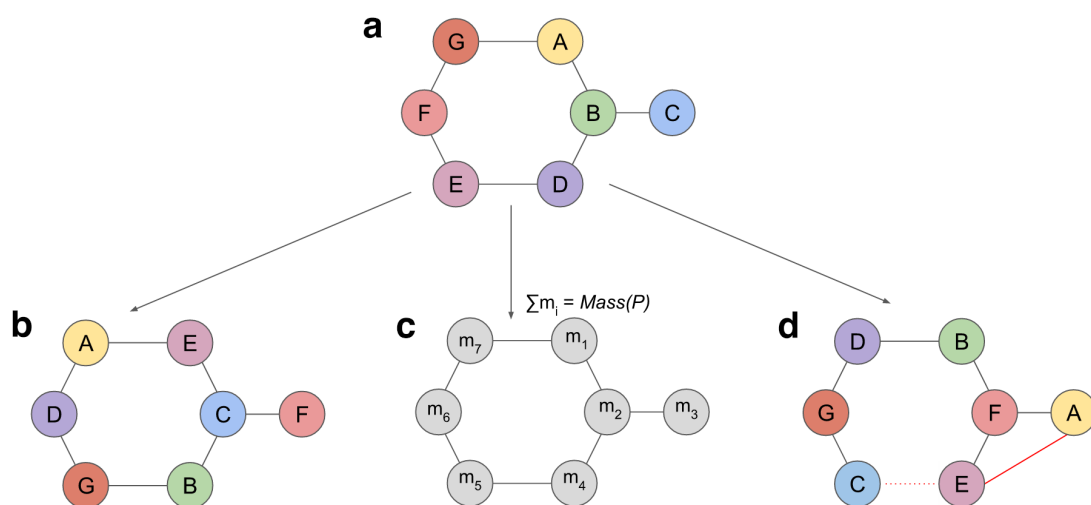

**Supplementary Figure 6. Various decoy generation strategies.** A target peptide (a) and its decoy versions generated by amino acid shuffling (b), mass redistribution (c), and amino acid shuffling plus displacement of a random bond (d).

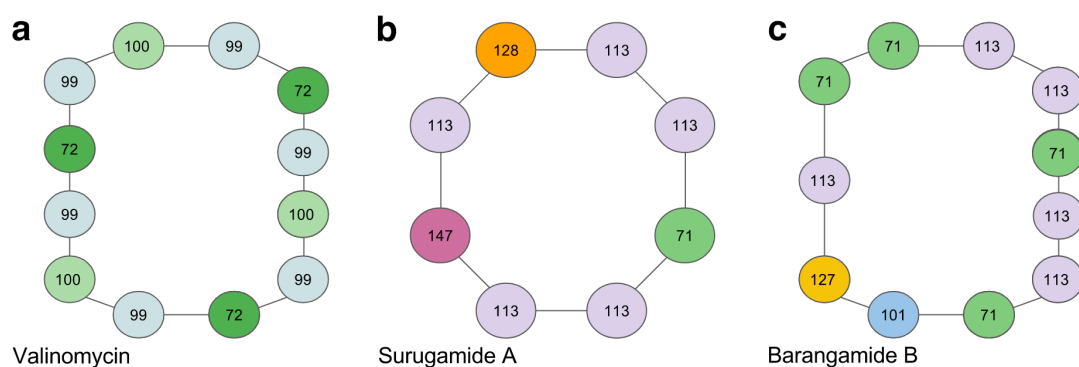

**Supplementary Figure 7. Examples of cyclic PNPs with high number of duplicated amino acids.** Numbers in nodes refer to amino acid masses in Da. The nodes with equal mass are colored the same.

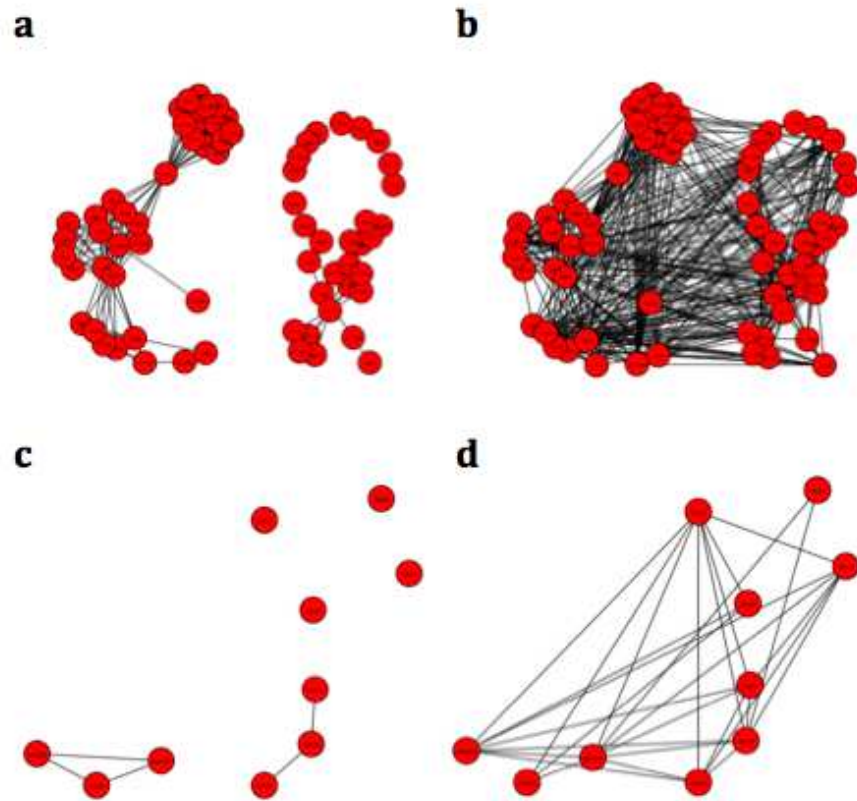

**Supplementary Figure 8. Strain graphs for *SpectraCYANO* (top) and *SpectraSTREP1* (bottom) datasets.** Each node represents a strain and two nodes are connected by an edge if they share a common known PNP (DEREPLICATOR identifications: left) or PNP variants of the same known PNP (VarQuest identifications: right). Note that, two leftmost nodes are connected by an edge in the bottom left (DEREPLICATOR) but not the bottom right (VarQuest) figure. The corresponding strains share a single PNP identified by DEREPLICATOR and when we switch to VarQuest, one of these identifications changed to a variant of another PNP with a better  $P$ -value. As the result, while these two strains are in the same connected component, they are not connected by an edge in the bottom right Figure.

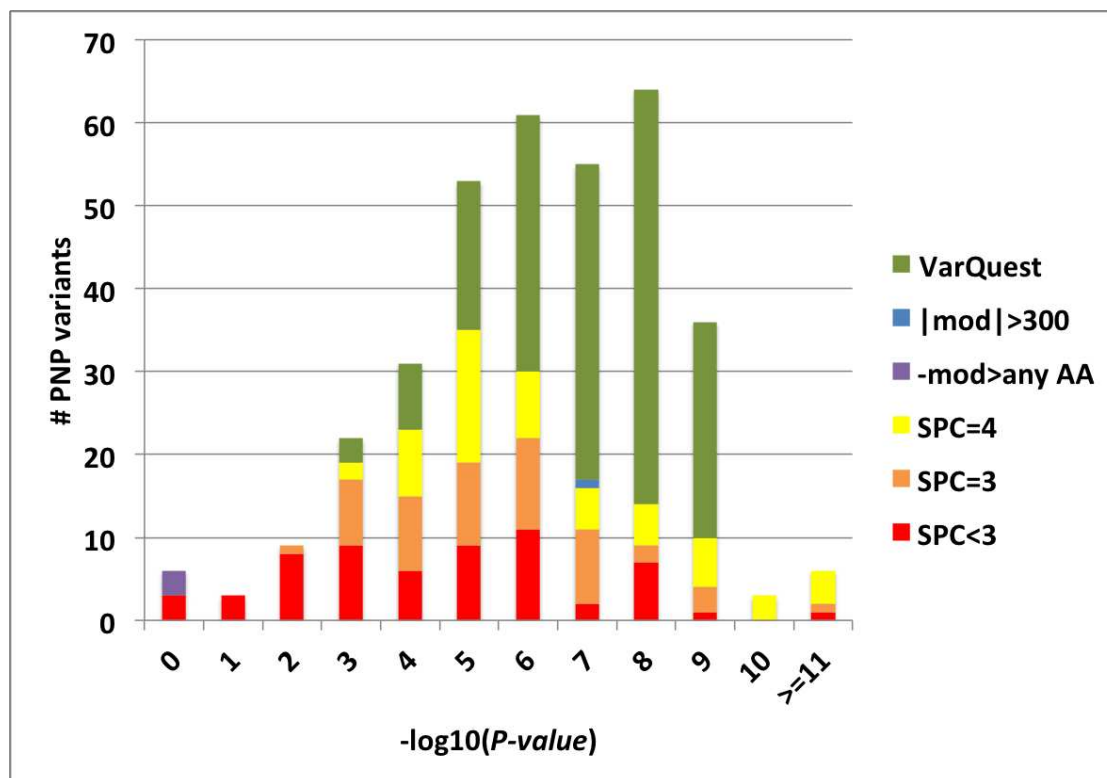

**Supplementary Figure 9. Distribution of the first iteration  $P$ -values for PNP variants identified in the second iterative run of VarQuest on  $Spectra_{CYANO}$ .** *VarQuest* stands for PNP variants identified by VarQuest on the first iteration but not reported due to  $P$ -values above the standard  $10^{-10}$  threshold.  $|mod| > 300$  stands for PNP variants with the absolute value of the total mass offset larger than default value of  $MaxMod=300$  Da.  $-mod > any AA$  is for PNP variants with negative mass offsets larger than mass of any amino acid in the corresponding known PNP (in this case *VariableScore* is not defined and VarQuest reports  $P$ -value=1). *SPC* stands for PNP variants with specified  $SPCScore(P, S)$  value. Note that a known PNP  $P$  is included in the VarQuest *CandidatePeptides(S)* lists for a spectrum  $S$  if  $SPCScore(P, S) \geq \eta$ , where default value for  $\eta$  is 5.



## Supplementary References

- [1] M. Wang *et al.*, “Sharing and community curation of mass spectrometry data with Global Natural Products Social Molecular Networking,” *Nat. Biotechnol.*, vol. 34, pp. 828–837, Aug 2016.
- [2] R. Gozalbes and A. Pineda-Lucena, “Small molecule databases and chemical descriptors useful in chemoinformatics: an overview,” *Comb. Chem. High Throughput Screen.*, vol. 14, pp. 548–458, Jul 2011.
- [3] J. Blunt, M. Munro, and H. Laatsch, “AntiMarin database,” *University of Canterbury; Christchurch, New Zealand; University of Gottingen; Gottingen, Germany*, 2007.
- [4] M. H. Medema *et al.*, “Minimum Information about a Biosynthetic Gene cluster,” *Nat. Chemical Biology*, vol. 11, pp. 625–631, Sep 2015.
- [5] X. Lucas, C. Senger, A. Erxleben, B. A. Gruning, K. Doring, J. Mosch, S. Flemming, and S. Gunther, “StreptomeDB: a resource for natural compounds isolated from Streptomyces species,” *Nucleic Acids Res.*, vol. 41, pp. D1130–1136, Jan 2013.
- [6] Y. Djoumbou Feunang, R. Eisner, C. Knox, L. Chepelev, J. Hastings, G. Owen, E. Fahy, C. Steinbeck, S. Subramanian, E. Bolton, R. Greiner, and D. S. Wishart, “ClassyFire: automated chemical classification with a comprehensive, computable taxonomy,” *J Cheminform.*, vol. 8, p. 61, 2016.
- [7] Z. Ma, N. Geudens, N. P. Kieu, D. Sinnaeve, M. Ongena, J. C. Martins, and M. Hofte, “Biosynthesis, Chemical Structure, and Structure-Activity Relationship of Orfamide Lipopeptides Produced by *Pseudomonas protegens* and Related Species,” *Front Microbiol.*, vol. 7, p. 382, 2016.
- [8] W. Li, H. Rokni-Zadeh, M. De Vleeschouwer, M. G. Ghequire, D. Sinnaeve, G. L. Xie, J. Rozenski, A. Madder, J. C. Martins, and R. De Mot, “The antimicrobial compound xantholysin defines a new group of *Pseudomonas* cyclic lipopeptides,” *PLoS ONE*, vol. 8, no. 5, p. e62946, 2013.
- [9] C. Bassarello, S. Lazzaroni, G. Bifulco, P. Lo Cantore, N. S. Iacobellis, R. Riccio, L. Gomez-Paloma, and A. Evidente, “Tolaasins A–E, five new lipodepsipeptides produced by *Pseudomonas tolaasii*,” *J. Nat. Prod.*, vol. 67, pp. 811–816, May 2004.
- [10] I. Kuiper, E. L. Lagendijk, R. Pickford, J. P. Derrick, G. E. Lamers, J. E. Thomas-Oates, B. J. Lugtenberg, and G. V. Bloemberg, “Characterization of two *Pseudomonas putida* lipopeptide biosurfactants, putisolvin I and II, which inhibit biofilm formation and break down existing biofilms,” *Mol. Microbiol.*, vol. 51, pp. 97–113, Jan 2004.
- [11] J. Gerard, R. Lloyd, T. Barsby, P. Haden, M. T. Kelly, and R. J. Andersen, “Massetolides A–H, antimycobacterial cyclic depsipeptides produced by two pseudomonads isolated from marine habitats,” *J. Nat. Prod.*, vol. 60, pp. 223–229, Mar 1997.
- [12] D. Sinnaeve, P. M. Hendrickx, J. Van Hemel, E. Peys, B. Kieffer, and J. C. Martins, “The solution structure and self-association properties of the cyclic lipodepsipeptide pseudodesmin A support its pore-forming potential,” *Chemistry*, vol. 15, pp. 12653–12662, Nov 2009.
- [13] D. Sorensen, T. H. Nielsen, C. Christophersen, J. Sørensen, and M. Gajhede, “Cyclic lipoundecapeptide amphisin from *Pseudomonas* sp. strain DSS73,” *Acta Crystallogr C*, vol. 57, pp. 1123–1124, Sep 2001.
- [14] K. Arima *et al.*, “Surfactin, a crystalline peptide lipid surfactant produced by *Bacillus subtilis*: Isolation, characterization and its inhibition of fibrin clot formation,” *Biochem. Biophys. Res. Commun.*, vol. 31, pp. 488–494, 1968.
- [15] T. Ito and H. Ogawa, “Chemical studies on the antibiotic esperin,” *Bulletin of the Agricultural Chemical Society of Japan*, vol. 23, no. 6, pp. 536–547, 1959.

- [16] N. Naruse, O. Tenmyo, S. Kobaru, H. Kamei, T. Miyaki, M. Konishi, and T. Oki, "Pumilacidin, a complex of new antiviral antibiotics. Production, isolation, chemical properties, structure and biological activity," *J. Antibiot.*, vol. 43, pp. 267–280, Mar 1990.
- [17] Q. Zhou *et al.*, "Xentrivalpeptides AQ: Depsipeptide Diversification in *Xenorhabdus*," *J. Nat. Prod.*, vol. 75, no. 10, pp. 1717–1722, 2012.
- [18] F. Peypoux, F. Besson, G. Michel, and L. Delcambe, "Structure of bacillomycin D, a new antibiotic of the iturin group," *Eur. J. Biochem.*, vol. 118, pp. 323–327, Aug 1981.
- [19] Y. Kajimura, M. Sugiyama, and M. Kaneda, "Bacillopeptins, new cyclic lipopeptide antibiotics from *Bacillus subtilis* FR-2," *J. Antibiot.*, vol. 48, pp. 1095–1103, Oct 1995.
- [20] Y. Esumi, Y. Suzuki, Y. Itoh, M. Chijimatsu, M. Uramoto, K. Kimura, S. Nakayama, M. Yoshihama, T. Ichikawa, T. Haramo, and J. Fujishige, "SNA-60-367 components, new peptide enzyme inhibitors of aromatase: structure of the fatty acid side chain and amino acid sequence by mass spectrometry," *J. Antibiot.*, vol. 56, pp. 716–720, Aug 2003.
- [21] K. Kaida *et al.*, "New cyclic depsipeptide antibiotics, clavariopsins a and b, produced by an aquatic hyphomycetes, clavariopsis aquatica. 1. taxonomy, fermentation, isolation, and biological properties," *J Antibiot (Tokyo)*, vol. 54, no. 1, pp. 17–21, 2001.
- [22] R. B. Bates, S. Caldera, and M. D. Ruane, "Synthesis and Stereochemistry of Axinastatin 4," *J. Nat. Prod.*, vol. 61, p. 405, Mar 1998.
- [23] A. Sakurai *et al.*, "Isolation and structure elucidation of substance-ib, a hexapeptide inducing sexual agglutination in *saccharomyces cerevisiae*," *Agricultural and Biological Chemistry*, vol. 40, no. 7, pp. 1451–1452, 1976.
- [24] S. R. Ibrahim, C. C. Min, F. Teuscher, R. Ebel, C. Kakoschke, W. Lin, V. Wray, R. Edrada-Ebel, and P. Proksch, "Callyaerins A-F and H, new cytotoxic cyclic peptides from the Indonesian marine sponge *Callyspongia aerizusa*," *Bioorg. Med. Chem.*, vol. 18, pp. 4947–4956, Jul 2010.
- [25] J. Vicente, B. Vera, A. D. Rodriguez, I. Rodriguez-Escudero, and R. G. Raptis, "Euryjanicin A: a new cycloheptapeptide from the Caribbean marine sponge *Prosuberites laughlini*," *Tetrahedron Lett.*, vol. 50, pp. 4571–4574, Aug 2009.
- [26] B. F. Erlanger and L. Goode, "Gramicidin S; relationship of cyclic structure to antibiotic activity," *Nature*, vol. 174, pp. 840–841, Oct 1954.
- [27] J. Kobayashi *et al.*, "Hymenamides F, new cyclic heptapeptide from marine sponge *Hymeniacidon* sp," *Tetrahedron*, vol. 52, no. 18, pp. 6355–6360, 1996.
- [28] N. Sitachitta *et al.*, "Yanucamides A and B, two new depsipeptides from an assemblage of the marine cyanobacteria *Lyngbya majuscula* and *Schizothrix* species," *J Nat Prod*, vol. 63, no. 2, pp. 197–200, 2000.
- [29] J. B. MacMillan, M. A. Ernst-Russell, J. S. de Ropp, and T. F. Molinski, "Lobocyclamides A-C, lipopeptides from a cryptic cyanobacterial mat containing *Lyngbya confervoides*," *J. Org. Chem.*, vol. 67, pp. 8210–8215, Nov 2002.
- [30] R. Fernandez *et al.*, "Malaysiatin, the first cyclic heptapeptide from a marine sponge," *Tetrahedron Letters*, vol. 33, no. 40, pp. 6017–6020, 1992.
- [31] O. Sterner, W. Etzel, A. Mayer, and H. Anke, "Omphalotin, a new cyclic peptide with potent nematocidal activity from *omphalotus olearius* ii. isolation and structure determination," *Natural Product Letters*, vol. 10, no. 1, pp. 33–38, 1997.
- [32] G. R. Pettit, J. W. Lippert, S. R. Taylor, R. Tan, and M. D. Williams, "Synthesis of phakellistatin 11: a micronesia (*Chuuk*) marine sponge cyclooctapeptide," *J. Nat. Prod.*, vol. 64, pp. 883–891, Jul 2001.

- [33] D. Williams, K. Yu, H. Behrisch, R. Van Soest, and R. Andersen, "Rolloamides A and B, cytotoxic cyclic heptapeptides isolated from the Caribbean marine sponge *Eurypon laughlini*," *J Nat Prod*, vol. 72, no. 7, pp. 1253–7, 2009.
- [34] M. Arai, Y. Yamano, M. Fujita, A. Setiawan, and M. Kobayashi, "Styllissamide X, a new proline-rich cyclic octapeptide as an inhibitor of cell migration, from an Indonesian marine sponge of *Stylissa* sp," *Bioorg. Med. Chem. Lett.*, vol. 22, pp. 1818–1821, Feb 2012.
- [35] X. Zou, S. Niu, J. Ren, E. Li, X. Liu, and Y. Che, "Verrucamides A-D, antibacterial cyclopeptides from *Myrothecium verrucaria*," *J. Nat. Prod.*, vol. 74, pp. 1111–1116, May 2011.
- [36] J. Tabudravu *et al.*, "Wainunuamide, a histidine-containing proline-rich cyclic heptapeptide isolated from the fijian marine sponge *Stylorella aurantium*," *Tetrahedron Letters*, vol. 42, no. 52, pp. 9273–9276, 2001.
- [37] K. Takada, A. Ninomiya, M. Naruse, Y. Sun, M. Miyazaki, Y. Nogi, S. Okada, and S. Matsunaga, "Surugamides A-E, cyclic octapeptides with four D-amino acid residues, from a marine *Streptomyces* sp.: LC-MS-aided inspection of partial hydrolysates for the distinction of D- and L-amino acid residues in the sequence," *J. Org. Chem.*, vol. 78, pp. 6746–6750, Jul 2013.
- [38] A. Pesic, H. I. Baumann, K. Kleinschmidt, P. Ensle, J. Wiese, R. D. Sussmuth, and J. F. Imhoff, "Champacyclin, a new cyclic octapeptide from *Streptomyces* strain C42 isolated from the Baltic Sea," *Mar Drugs*, vol. 11, pp. 4834–4857, Dec 2013.
- [39] H. Mohimani, A. Gurevich, A. Mikheenko, N. Garg, L. F. Nothias, A. Ninomiya, K. Takada, P. C. Dorrestein, and P. A. Pevzner, "Dereplication of peptidic natural products through database search of mass spectra," *Nat. Chem. Biol.*, vol. 13, pp. 30–37, Jan 2017.
- [40] R. Sekizawa, I. Momose, N. Kinoshita, H. Naganawa, M. Hamada, Y. Muraoka, H. Iinuma, and T. Takeuchi, "Isolation and structural determination of phepropeptins A, B, C, and D, new proteasome inhibitors, produced by *Streptomyces* sp," *J Antibiot (Tokyo)*, vol. 54, no. 11, pp. 874–881, 2001.
- [41] Q. Li, Y. Song, X. Qin, X. Zhang, A. Sun, and J. Ju, "Identification of the biosynthetic gene cluster for the anti-infective desotamides and production of a new analogue in a heterologous host," *J Nat Prod*, vol. 78, no. 4, pp. 944–8, 2015.
- [42] W. T. Liu, A. Lamsa, W. R. Wong, P. D. Boudreau, R. Kersten, Y. Peng, W. J. Moree, B. M. Duggan, B. S. Moore, W. H. Gerwick, R. G. Linington, K. Pogliano, and P. C. Dorrestein, "MS/MS-based networking and peptidogenomics guided genome mining revealed the stenothricin gene cluster in *Streptomyces roseosporus*," *J. Antibiot.*, vol. 67, pp. 99–104, Jan 2014.
- [43] K. Matsuno, Y. Yamada, C. Lee, and T. Nihira, "Identification by gene deletion analysis of barB as a negative regulator controlling an early process of virginiamycin biosynthesis in *Streptomyces virginiae*," *Arch Microbiol.*, vol. 181, pp. 52–9, Jan 2004.
- [44] L. C. Vining and W. A. Taber, "Isariin, a new depsipeptide from *isaria cretacea*," *Canadian Journal of Chemistry*, vol. 40, no. 8, pp. 1579–1584, 1962.
- [45] R. Baute, G. Deffieux, D. Merlet, M. Baute, and A. Neveu, "New insecticidal cyclodepsipeptides from the fungus *Isaria felina*. I. Production, isolation and insecticidal properties of isariins B, C and D," *J Antibiot (Tokyo)*, vol. 34, no. 10, pp. 1261–1265, 1981.
- [46] S. Kiyotake, M. Tsuyoshi, S. Takunobu, I. Takashi, F. Tatsuya, T. Noboru, H. Kozue, T. Masaki, I. Taiji, K. Hideo, and Y. Kiyoyuki, "Aurilide, a cytotoxic depsipeptide from the sea hare *Dolabella auricularia*: isolation, structure determination, synthesis, and biological activity," *Tetrahedron*, vol. 60, pp. 8509–8527, Sep 2004.
- [47] M. Roy *et al.*, "Barangamide A, a new cyclic peptide from the Indonesian sponge *Theonella swinhoei*," *Tetrahedron Letters*, vol. 40, pp. 5373–5376, Jul 1999.

- [48] L. A. Romanenko, M. Uchino, N. I. Kalinovskaya, and V. V. Mikhailov, "Isolation, phylogenetic analysis and screening of marine mollusc-associated bacteria for antimicrobial, hemolytic and surface activities," *Microbiol. Res.*, vol. 163, no. 6, pp. 633–644, 2008.
- [49] J. Malmstrom, A. Ryager, U. Anthoni, and P. H. Nielsen, "Unguisin C, a GABA-containing cyclic peptide from the fungus *Emericella unguis*," *Phytochemistry*, vol. 60, pp. 869–872, Aug 2002.
- [50] D. Hopwood and H. Wright, "CDA is a new chromosomally-determined antibiotic from *Streptomyces coelicolor* A3(2)," *J Gen Microbiol*, vol. 192, no. 12, pp. 3575–9, 1983.
- [51] J. Bitzer, V. Gesheva, and A. Zeeck, "Actinomycins with altered threonine units in the beta-peptidolactone," *J. Nat. Prod.*, vol. 69, pp. 1153–1157, Aug 2006.
- [52] F. Kong and G. Carter, "Structure determination of glycinocins a to d, further evidence for the cyclic structure of the amphomycin antibiotics," *J Antibiot (Tokyo)*, vol. 56, no. 6, pp. 557–564, 2003.
- [53] Z. Xie, L. Zhou, L. Guo, X. Yang, G. Qu, C. Wu, and S. Zhang, "Grisemycin, a Bridged Angucyclinone with a Methylsulfinyl Moiety from a Marine-Derived *Streptomyces* sp.," *Org. Lett.*, vol. 18, pp. 1402–1405, Mar 2016.
- [54] H. S. Lee, H. J. Shin, K. H. Jang, T. S. Kim, K. B. Oh, and J. Shin, "Cyclic peptides of the nocardamine class from a marine-derived bacterium of the genus *Streptomyces*," *J. Nat. Prod.*, vol. 68, pp. 623–625, Apr 2005.
- [55] M. Richter *et al.*, "Streptofactin, a novel biosurfactant with aerial mycelium inducing activity from *Streptomyces tendae* Tu 901/8c," *FEMS Microbiology Letters*, vol. 163, no. 2, pp. 165–171, 1998.
- [56] S. Kodani, K. Sato, H. Hemmi, and M. Ohnishi-Kameyama, "Isolation and structural determination of a new hydrophobic peptide venepptide from *Streptomyces venezuelae*," *J. Antibiot.*, vol. 67, pp. 839–842, Dec 2014.
- [57] Z. Yu, S. Vodanovic-Jankovic, M. Kron, and B. Shen, "New WS9326A congeners from *Streptomyces* sp. 9078 inhibiting *Brugia malayi* asparaginyl-tRNA synthetase," *Org. Lett.*, vol. 14, pp. 4946–4949, Sep 2012.
- [58] K. J. Wesson and M. T. Hamann, "Keenamides A, a bioactive cyclic peptide from the marine mollusk *Pleurobranchus forskalii*," *J. Nat. Prod.*, vol. 59, pp. 629–631, Jun 1996.
- [59] M. Iwatsuki *et al.*, "Lariatins, antimycobacterial peptides produced by *Rhodococcus* sp. K01-B0171, have a lasso structure," *J Am Chem Soc*, vol. 128, no. 23, pp. 7486–91, 2006.
- [60] O. Perlova, K. Gerth, S. Kuhlmann, Y. Zhang, and R. Muller, "Novel expression hosts for complex secondary metabolite megasynthetases: Production of myxochromide in the thermophilic isolate *Coralloccoccus macrosporus* GT-2," *Microb. Cell Fact.*, vol. 8, p. 1, Jan 2009.
- [61] D. Hoffmann *et al.*, "Sequence analysis and biochemical characterization of the nostopeptolide A biosynthetic gene cluster from *Nostoc* sp. GSV224," *Gene*, vol. 311, pp. 171–80, 2003.
- [62] K. K. Lee, J. B. Gloer, J. A. Scott, and D. Malloch, "Petriellin a: A novel antifungal depsipeptide from the coprophilous fungus *Petriella sordida*," *The Journal of Organic Chemistry*, vol. 60, no. 17, pp. 5384–5385, 1995.
- [63] A. Aoyagi *et al.*, "Pleofungins, novel inositol phosphorylceramide synthase inhibitors, from *Phoma* sp. SANK 13899," *J. Antibiot*, vol. 60, no. 2, pp. 143–52, 2007.
- [64] C. Ruangviryachai *et al.*, "An exceptionally large pyoverdine from a *Pseudomonas* strain collected in Thailand," *Z. Naturforsch.*, vol. 55c, pp. 323–327, 2000.

- [65] V. Hedge *et al.*, “A family of depsipeptide fungal metabolites, as selective and competitive human tachykinin receptor (NK2) antagonists: Fermentation, isolation, physico-chemical properties, and biological activity,” *J Antibiot (Tokyo)*, vol. 54, no. 2, pp. 125–135, 2001.
- [66] M. Kronenwerth *et al.*, “Characterisation of taxllalids A-G; natural products from *Xenorhabdus indica*,” *Chemistry*, vol. 20, no. 52, pp. 17478–87, 2014.
- [67] J. Cai, A. Bhatnagar, and W. M. Pierce, “Protein modification by acrolein: formation and stability of cysteine adducts,” *Chem. Res. Toxicol.*, vol. 22, pp. 708–716, Apr 2009.
- [68] M. Rottig, M. H. Medema, K. Blin, T. Weber, C. Rausch, and O. Kohlbacher, “NRPSpredictor2—a web server for predicting NRPS adenylation domain specificity,” *Nucleic Acids Res.*, vol. 39, pp. W362–367, Jul 2011.
- [69] M. H. Medema, K. Blin, P. Cimermancic, V. de Jager, P. Zakrzewski, M. A. Fischbach, T. Weber, E. Takano, and R. Breitling, “antiSMASH: rapid identification, annotation and analysis of secondary metabolite biosynthesis gene clusters in bacterial and fungal genome sequences,” *Nucleic Acids Res.*, vol. 39, pp. W339–346, Jul 2011.
- [70] N. Bandeira, “Spectral networks: a new approach to de novo discovery of protein sequences and posttranslational modifications,” *BioTechniques*, vol. 42, pp. 687–695, Jun 2007.
- [71] J. Watrous, P. Roach, T. Alexandrov, B. S. Heath, J. Y. Yang, R. D. Kersten, M. van der Voort, K. Pogliano, H. Gross, J. M. Raaijmakers, B. S. Moore, J. Laskin, N. Bandeira, and P. C. Dorrestein, “Mass spectral molecular networking of living microbial colonies,” *Proc. Natl. Acad. Sci. U.S.A.*, vol. 109, pp. E1743–1752, Jun 2012.
- [72] H. Mohimani, W. T. Liu, Y. L. Yang, S. P. Gaudencio, W. Fenical, P. C. Dorrestein, and P. A. Pevzner, “Multiplex de novo sequencing of peptide antibiotics,” *J. Comput. Biol.*, vol. 18, pp. 1371–1381, Nov 2011.
